# Supplementary material for: Microplasma-assisted hydrogel fabrication: A novel method for gelatin-graphene oxide nano composite hydrogel synthesis for biomedical application
Source: PeerJ. 2017 Jun 27;5:e3498. doi: 10.7717/peerj.3498 (PMC5490464; doi:10.7717/peerj.3498)
Supplement: Supplemental Information 2 — FTIR spectra of: original high functionality graphene oxide (red line), gelatin (blue line) untreated gelatin-graphene oxide gel sample (gray line) and Ar- microplasma treated gelatin-graphene oxide cross-linked sample (hydrogel) (yellow line). The FTIR spectrum of the un-cross-linked gelatin and graphene oxide revealed a structure that was quite similar to raw gelatin and graphene oxide after gelatine grapheme oxide nano-composite hydrogel preparation. [file peerj-05-3498-s002.xlsx]

## Sheet: 工作表1
Gelatin		GO		Gel-GO untreat		Gel-GO-T
4000	17.85	4000	24.57	4000	10.86	4000	13.27
3998	17.84	3998	24.57	3998	10.85	3998	13.26
3996	17.84	3996	24.56	3996	10.85	3996	13.25
3994	17.83	3994	24.55	3994	10.84	3994	13.25
3992	17.82	3992	24.55	3992	10.83	3992	13.24
3990	17.81	3990	24.54	3990	10.82	3990	13.23
3988	17.81	3988	24.53	3988	10.82	3988	13.23
3986	17.8	3986	24.53	3986	10.81	3986	13.22
3984	17.8	3984	24.53	3984	10.81	3984	13.22
3982	17.8	3982	24.52	3982	10.8	3982	13.22
3980	17.8	3980	24.52	3980	10.8	3980	13.22
3978	17.79	3978	24.52	3978	10.8	3978	13.21
3976	17.79	3976	24.52	3976	10.79	3976	13.21
3974	17.79	3974	24.51	3974	10.78	3974	13.21
3972	17.78	3972	24.51	3972	10.78	3972	13.21
3970	17.78	3970	24.51	3970	10.78	3970	13.21
3968	17.78	3968	24.51	3968	10.77	3968	13.21
3966	17.79	3966	24.52	3966	10.77	3966	13.21
3964	17.79	3964	24.51	3964	10.77	3964	13.21
3962	17.78	3962	24.51	3962	10.77	3962	13.21
3960	17.78	3960	24.51	3960	10.76	3960	13.21
3958	17.78	3958	24.51	3958	10.76	3958	13.21
3956	17.79	3956	24.51	3956	10.76	3956	13.21
3954	17.79	3954	24.51	3954	10.76	3954	13.22
3952	17.79	3952	24.51	3952	10.75	3952	13.22
3950	17.79	3950	24.51	3950	10.75	3950	13.23
3948	17.79	3948	24.52	3948	10.75	3948	13.23
3946	17.79	3946	24.51	3946	10.75	3946	13.23
3944	17.79	3944	24.51	3944	10.75	3944	13.23
3942	17.79	3942	24.52	3942	10.74	3942	13.24
3940	17.8	3940	24.52	3940	10.74	3940	13.24
3938	17.8	3938	24.52	3938	10.74	3938	13.24
3936	17.81	3936	24.52	3936	10.75	3936	13.25
3934	17.81	3934	24.53	3934	10.75	3934	13.25
3932	17.82	3932	24.53	3932	10.75	3932	13.25
3930	17.82	3930	24.53	3930	10.75	3930	13.26
3928	17.82	3928	24.54	3928	10.75	3928	13.26
3926	17.83	3926	24.54	3926	10.75	3926	13.27
3924	17.83	3924	24.54	3924	10.75	3924	13.27
3922	17.83	3922	24.54	3922	10.74	3922	13.27
3920	17.83	3920	24.54	3920	10.74	3920	13.28
3918	17.83	3918	24.54	3918	10.74	3918	13.27
3916	17.83	3916	24.53	3916	10.73	3916	13.27
3914	17.83	3914	24.54	3914	10.73	3914	13.26
3912	17.83	3912	24.54	3912	10.73	3912	13.26
3910	17.83	3910	24.54	3910	10.73	3910	13.26
3908	17.83	3908	24.55	3908	10.73	3908	13.26
3906	17.83	3906	24.55	3906	10.72	3906	13.26
3904	17.83	3904	24.55	3904	10.72	3904	13.27
3902	17.82	3902	24.55	3902	10.71	3902	13.27
3900	17.81	3900	24.54	3900	10.7	3900	13.27
3898	17.81	3898	24.53	3898	10.7	3898	13.26
3896	17.8	3896	24.53	3896	10.69	3896	13.26
3894	17.79	3894	24.53	3894	10.69	3894	13.25
3892	17.79	3892	24.53	3892	10.69	3892	13.25
3890	17.79	3890	24.53	3890	10.68	3890	13.25
3888	17.79	3888	24.54	3888	10.68	3888	13.25
3886	17.78	3886	24.53	3886	10.67	3886	13.25
3884	17.77	3884	24.52	3884	10.66	3884	13.25
3882	17.76	3882	24.51	3882	10.66	3882	13.25
3880	17.76	3880	24.51	3880	10.65	3880	13.24
3878	17.76	3878	24.51	3878	10.65	3878	13.24
3876	17.75	3876	24.51	3876	10.65	3876	13.24
3874	17.75	3874	24.51	3874	10.65	3874	13.24
3872	17.75	3872	24.51	3872	10.65	3872	13.24
3870	17.74	3870	24.51	3870	10.64	3870	13.24
3868	17.73	3868	24.5	3868	10.64	3868	13.24
3866	17.73	3866	24.5	3866	10.63	3866	13.23
3864	17.72	3864	24.5	3864	10.63	3864	13.22
3862	17.72	3862	24.51	3862	10.64	3862	13.22
3860	17.73	3860	24.52	3860	10.64	3860	13.22
3858	17.73	3858	24.53	3858	10.64	3858	13.23
3856	17.73	3856	24.53	3856	10.64	3856	13.23
3854	17.73	3854	24.53	3854	10.63	3854	13.24
3852	17.72	3852	24.52	3852	10.62	3852	13.24
3850	17.72	3850	24.52	3850	10.61	3850	13.24
3848	17.72	3848	24.52	3848	10.61	3848	13.23
3846	17.72	3846	24.53	3846	10.6	3846	13.22
3844	17.73	3844	24.54	3844	10.61	3844	13.23
3842	17.74	3842	24.56	3842	10.61	3842	13.24
3840	17.74	3840	24.57	3840	10.61	3840	13.25
3838	17.74	3838	24.56	3838	10.6	3838	13.26
3836	17.74	3836	24.56	3836	10.6	3836	13.27
3834	17.73	3834	24.54	3834	10.59	3834	13.27
3832	17.73	3832	24.54	3832	10.59	3832	13.27
3830	17.73	3830	24.54	3830	10.59	3830	13.26
3828	17.74	3828	24.55	3828	10.59	3828	13.25
3826	17.75	3826	24.56	3826	10.59	3826	13.26
3824	17.75	3824	24.57	3824	10.59	3824	13.26
3822	17.75	3822	24.58	3822	10.59	3822	13.27
3820	17.75	3820	24.57	3820	10.58	3820	13.28
3818	17.74	3818	24.56	3818	10.57	3818	13.28
3816	17.73	3816	24.55	3816	10.55	3816	13.27
3814	17.72	3814	24.54	3814	10.54	3814	13.26
3812	17.72	3812	24.54	3812	10.53	3812	13.24
3810	17.72	3810	24.55	3810	10.53	3810	13.23
3808	17.72	3808	24.56	3808	10.52	3808	13.23
3806	17.72	3806	24.57	3806	10.51	3806	13.24
3804	17.72	3804	24.57	3804	10.5	3804	13.24
3802	17.71	3802	24.57	3802	10.49	3802	13.25
3800	17.7	3800	24.56	3800	10.48	3800	13.25
3798	17.68	3798	24.54	3798	10.46	3798	13.24
3796	17.67	3796	24.53	3796	10.45	3796	13.23
3794	17.66	3794	24.52	3794	10.43	3794	13.21
3792	17.66	3792	24.52	3792	10.42	3792	13.2
3790	17.65	3790	24.52	3790	10.41	3790	13.19
3788	17.65	3788	24.53	3788	10.39	3788	13.19
3786	17.65	3786	24.53	3786	10.38	3786	13.19
3784	17.64	3784	24.52	3784	10.37	3784	13.19
3782	17.63	3782	24.51	3782	10.35	3782	13.19
3780	17.62	3780	24.5	3780	10.34	3780	13.18
3778	17.61	3778	24.49	3778	10.32	3778	13.17
3776	17.6	3776	24.48	3776	10.31	3776	13.16
3774	17.59	3774	24.48	3774	10.3	3774	13.15
3772	17.59	3772	24.49	3772	10.29	3772	13.14
3770	17.58	3770	24.49	3770	10.27	3770	13.14
3768	17.58	3768	24.49	3768	10.26	3768	13.13
3766	17.57	3766	24.49	3766	10.25	3766	13.12
3764	17.56	3764	24.49	3764	10.23	3764	13.1
3762	17.55	3762	24.49	3762	10.22	3762	13.08
3760	17.54	3760	24.49	3760	10.21	3760	13.07
3758	17.53	3758	24.49	3758	10.2	3758	13.05
3756	17.52	3756	24.5	3756	10.18	3756	13.04
3754	17.52	3754	24.51	3754	10.17	3754	13.04
3752	17.51	3752	24.52	3752	10.16	3752	13.03
3750	17.51	3750	24.53	3750	10.15	3750	13.03
3748	17.51	3748	24.53	3748	10.14	3748	13.03
3746	17.51	3746	24.53	3746	10.12	3746	13.02
3744	17.51	3744	24.53	3744	10.1	3744	13.01
3742	17.51	3742	24.54	3742	10.09	3742	13.01
3740	17.52	3740	24.55	3740	10.07	3740	13
3738	17.53	3738	24.57	3738	10.06	3738	13
3736	17.53	3736	24.58	3736	10.05	3736	13.01
3734	17.53	3734	24.59	3734	10.03	3734	13.02
3732	17.53	3732	24.59	3732	10.01	3732	13.01
3730	17.52	3730	24.58	3730	9.99	3730	13.01
3728	17.51	3728	24.58	3728	9.96	3728	12.99
3726	17.5	3726	24.58	3726	9.94	3726	12.98
3724	17.49	3724	24.58	3724	9.91	3724	12.96
3722	17.49	3722	24.58	3722	9.88	3722	12.94
3720	17.48	3720	24.59	3720	9.86	3720	12.92
3718	17.48	3718	24.59	3718	9.83	3718	12.91
3716	17.47	3716	24.59	3716	9.8	3716	12.89
3714	17.45	3714	24.58	3714	9.76	3714	12.87
3712	17.43	3712	24.56	3712	9.72	3712	12.85
3710	17.4	3710	24.54	3710	9.68	3710	12.82
3708	17.37	3708	24.52	3708	9.63	3708	12.78
3706	17.35	3706	24.5	3706	9.59	3706	12.74
3704	17.32	3704	24.48	3704	9.54	3704	12.69
3702	17.3	3702	24.48	3702	9.5	3702	12.65
3700	17.28	3700	24.48	3700	9.45	3700	12.6
3698	17.26	3698	24.47	3698	9.4	3698	12.56
3696	17.23	3696	24.46	3696	9.34	3696	12.51
3694	17.2	3694	24.44	3694	9.28	3694	12.46
3692	17.16	3692	24.41	3692	9.21	3692	12.4
3690	17.11	3690	24.38	3690	9.14	3690	12.33
3688	17.07	3688	24.35	3688	9.06	3688	12.26
3686	17.03	3686	24.33	3686	8.99	3686	12.18
3684	16.99	3684	24.31	3684	8.92	3684	12.09
3682	16.96	3682	24.3	3682	8.85	3682	12.01
3680	16.93	3680	24.3	3680	8.78	3680	11.93
3678	16.89	3678	24.29	3678	8.7	3678	11.84
3676	16.85	3676	24.27	3676	8.61	3676	11.76
3674	16.8	3674	24.23	3674	8.51	3674	11.66
3672	16.74	3672	24.19	3672	8.41	3672	11.56
3670	16.69	3670	24.14	3670	8.31	3670	11.45
3668	16.63	3668	24.08	3668	8.2	3668	11.33
3666	16.57	3666	24.03	3666	8.1	3666	11.21
3664	16.52	3664	23.98	3664	8.01	3664	11.1
3662	16.47	3662	23.93	3662	7.91	3662	10.98
3660	16.42	3660	23.88	3660	7.81	3660	10.87
3658	16.37	3658	23.83	3658	7.71	3658	10.76
3656	16.31	3656	23.76	3656	7.61	3656	10.65
3654	16.24	3654	23.69	3654	7.49	3654	10.54
3652	16.17	3652	23.6	3652	7.38	3652	10.42
3650	16.1	3650	23.5	3650	7.26	3650	10.3
3648	16.02	3648	23.39	3648	7.15	3648	10.17
3646	15.95	3646	23.29	3646	7.04	3646	10.04
3644	15.88	3644	23.19	3644	6.94	3644	9.91
3642	15.82	3642	23.1	3642	6.84	3642	9.79
3640	15.76	3640	23.02	3640	6.76	3640	9.68
3638	15.7	3638	22.93	3638	6.67	3638	9.57
3636	15.64	3636	22.84	3636	6.58	3636	9.47
3634	15.58	3634	22.75	3634	6.5	3634	9.36
3632	15.5	3632	22.64	3632	6.41	3632	9.25
3630	15.43	3630	22.53	3630	6.32	3630	9.14
3628	15.36	3628	22.42	3628	6.23	3628	9.03
3626	15.28	3626	22.32	3626	6.14	3626	8.91
3624	15.22	3624	22.23	3624	6.06	3624	8.81
3622	15.16	3622	22.14	3622	5.99	3622	8.7
3620	15.1	3620	22.06	3620	5.92	3620	8.6
3618	15.04	3618	21.98	3618	5.85	3618	8.51
3616	14.97	3616	21.89	3616	5.78	3616	8.42
3614	14.91	3614	21.8	3614	5.71	3614	8.32
3612	14.83	3612	21.7	3612	5.64	3612	8.23
3610	14.76	3610	21.6	3610	5.57	3610	8.13
3608	14.69	3608	21.5	3608	5.5	3608	8.04
3606	14.62	3606	21.41	3606	5.44	3606	7.95
3604	14.55	3604	21.32	3604	5.38	3604	7.86
3602	14.48	3602	21.23	3602	5.33	3602	7.77
3600	14.42	3600	21.15	3600	5.27	3600	7.68
3598	14.35	3598	21.07	3598	5.22	3598	7.6
3596	14.29	3596	20.99	3596	5.16	3596	7.52
3594	14.22	3594	20.91	3594	5.11	3594	7.44
3592	14.16	3592	20.84	3592	5.06	3592	7.36
3590	14.1	3590	20.76	3590	5	3590	7.28
3588	14.03	3588	20.69	3588	4.96	3588	7.21
3586	13.97	3586	20.62	3586	4.91	3586	7.14
3584	13.91	3584	20.55	3584	4.86	3584	7.07
3582	13.85	3582	20.48	3582	4.82	3582	6.99
3580	13.8	3580	20.42	3580	4.77	3580	6.93
3578	13.75	3578	20.36	3578	4.73	3578	6.86
3576	13.7	3576	20.3	3576	4.69	3576	6.8
3574	13.65	3574	20.25	3574	4.65	3574	6.74
3572	13.6	3572	20.19	3572	4.62	3572	6.69
3570	13.55	3570	20.14	3570	4.58	3570	6.63
3568	13.49	3568	20.08	3568	4.54	3568	6.57
3566	13.44	3566	20.02	3566	4.5	3566	6.52
3564	13.39	3564	19.96	3564	4.46	3564	6.46
3562	13.34	3562	19.9	3562	4.42	3562	6.41
3560	13.3	3560	19.85	3560	4.39	3560	6.36
3558	13.25	3558	19.8	3558	4.36	3558	6.31
3556	13.21	3556	19.75	3556	4.33	3556	6.26
3554	13.17	3554	19.7	3554	4.29	3554	6.22
3552	13.13	3552	19.65	3552	4.26	3552	6.17
3550	13.09	3550	19.59	3550	4.22	3550	6.13
3548	13.05	3548	19.53	3548	4.19	3548	6.09
3546	13.01	3546	19.47	3546	4.16	3546	6.05
3544	12.97	3544	19.42	3544	4.13	3544	6.01
3542	12.93	3542	19.37	3542	4.1	3542	5.97
3540	12.9	3540	19.32	3540	4.07	3540	5.93
3538	12.87	3538	19.28	3538	4.05	3538	5.9
3536	12.84	3536	19.23	3536	4.02	3536	5.86
3534	12.81	3534	19.18	3534	4	3534	5.83
3532	12.78	3532	19.14	3532	3.97	3532	5.8
3530	12.75	3530	19.09	3530	3.95	3530	5.77
3528	12.72	3528	19.04	3528	3.92	3528	5.74
3526	12.7	3526	18.99	3526	3.9	3526	5.71
3524	12.67	3524	18.94	3524	3.87	3524	5.68
3522	12.64	3522	18.89	3522	3.85	3522	5.65
3520	12.62	3520	18.84	3520	3.83	3520	5.63
3518	12.59	3518	18.79	3518	3.8	3518	5.6
3516	12.57	3516	18.73	3516	3.78	3516	5.57
3514	12.54	3514	18.68	3514	3.76	3514	5.55
3512	12.52	3512	18.63	3512	3.73	3512	5.52
3510	12.49	3510	18.58	3510	3.71	3510	5.5
3508	12.47	3508	18.53	3508	3.69	3508	5.47
3506	12.44	3506	18.47	3506	3.67	3506	5.45
3504	12.41	3504	18.42	3504	3.65	3504	5.43
3502	12.39	3502	18.36	3502	3.62	3502	5.4
3500	12.36	3500	18.31	3500	3.6	3500	5.38
3498	12.34	3498	18.25	3498	3.59	3498	5.36
3496	12.32	3496	18.2	3496	3.57	3496	5.34
3494	12.3	3494	18.15	3494	3.55	3494	5.32
3492	12.28	3492	18.11	3492	3.54	3492	5.3
3490	12.26	3490	18.06	3490	3.52	3490	5.28
3488	12.24	3488	18.01	3488	3.51	3488	5.27
3486	12.23	3486	17.96	3486	3.49	3486	5.25
3484	12.21	3484	17.91	3484	3.48	3484	5.23
3482	12.19	3482	17.87	3482	3.46	3482	5.21
3480	12.18	3480	17.82	3480	3.45	3480	5.2
3478	12.16	3478	17.78	3478	3.44	3478	5.18
3476	12.15	3476	17.73	3476	3.43	3476	5.17
3474	12.13	3474	17.69	3474	3.41	3474	5.15
3472	12.12	3472	17.64	3472	3.4	3472	5.14
3470	12.1	3470	17.6	3470	3.39	3470	5.13
3468	12.09	3468	17.55	3468	3.38	3468	5.11
3466	12.08	3466	17.51	3466	3.37	3466	5.1
3464	12.07	3464	17.48	3464	3.37	3464	5.09
3462	12.06	3462	17.44	3462	3.36	3462	5.08
3460	12.05	3460	17.41	3460	3.36	3460	5.07
3458	12.04	3458	17.38	3458	3.36	3458	5.06
3456	12.03	3456	17.34	3456	3.35	3456	5.05
3454	12.03	3454	17.31	3454	3.35	3454	5.04
3452	12.02	3452	17.28	3452	3.35	3452	5.03
3450	12.01	3450	17.26	3450	3.34	3450	5.02
3448	12	3448	17.23	3448	3.34	3448	5.01
3446	11.99	3446	17.2	3446	3.34	3446	5
3444	11.98	3444	17.18	3444	3.34	3444	4.99
3442	11.98	3442	17.15	3442	3.34	3442	4.99
3440	11.97	3440	17.13	3440	3.34	3440	4.98
3438	11.96	3438	17.11	3438	3.34	3438	4.97
3436	11.95	3436	17.09	3436	3.34	3436	4.96
3434	11.95	3434	17.07	3434	3.34	3434	4.96
3432	11.95	3432	17.06	3432	3.34	3432	4.95
3430	11.95	3430	17.06	3430	3.35	3430	4.95
3428	11.94	3428	17.05	3428	3.36	3428	4.94
3426	11.94	3426	17.05	3426	3.37	3426	4.94
3424	11.94	3424	17.05	3424	3.37	3424	4.94
3422	11.93	3422	17.05	3422	3.38	3422	4.93
3420	11.93	3420	17.05	3420	3.39	3420	4.93
3418	11.93	3418	17.05	3418	3.39	3418	4.93
3416	11.92	3416	17.05	3416	3.4	3416	4.92
3414	11.92	3414	17.05	3414	3.41	3414	4.92
3412	11.91	3412	17.06	3412	3.42	3412	4.92
3410	11.91	3410	17.06	3410	3.42	3410	4.91
3408	11.9	3408	17.06	3408	3.43	3408	4.91
3406	11.89	3406	17.06	3406	3.44	3406	4.91
3404	11.88	3404	17.06	3404	3.45	3404	4.9
3402	11.88	3402	17.06	3402	3.46	3402	4.9
3400	11.87	3400	17.07	3400	3.47	3400	4.9
3398	11.87	3398	17.08	3398	3.48	3398	4.9
3396	11.86	3396	17.09	3396	3.5	3396	4.9
3394	11.86	3394	17.1	3394	3.51	3394	4.9
3392	11.86	3392	17.12	3392	3.53	3392	4.9
3390	11.86	3390	17.14	3390	3.55	3390	4.9
3388	11.85	3388	17.16	3388	3.57	3388	4.9
3386	11.85	3386	17.18	3386	3.58	3386	4.9
3384	11.85	3384	17.2	3384	3.6	3384	4.9
3382	11.85	3382	17.23	3382	3.62	3382	4.9
3380	11.85	3380	17.26	3380	3.65	3380	4.9
3378	11.85	3378	17.29	3378	3.67	3378	4.9
3376	11.84	3376	17.31	3376	3.69	3376	4.9
3374	11.84	3374	17.34	3374	3.7	3374	4.9
3372	11.83	3372	17.37	3372	3.72	3372	4.9
3370	11.83	3370	17.4	3370	3.75	3370	4.9
3368	11.83	3368	17.44	3368	3.77	3368	4.9
3366	11.82	3366	17.47	3366	3.79	3366	4.9
3364	11.82	3364	17.51	3364	3.82	3364	4.9
3362	11.82	3362	17.56	3362	3.84	3362	4.9
3360	11.82	3360	17.6	3360	3.87	3360	4.9
3358	11.81	3358	17.64	3358	3.9	3358	4.9
3356	11.81	3356	17.68	3356	3.92	3356	4.9
3354	11.81	3354	17.72	3354	3.95	3354	4.9
3352	11.81	3352	17.76	3352	3.97	3352	4.9
3350	11.8	3350	17.8	3350	4	3350	4.91
3348	11.8	3348	17.84	3348	4.03	3348	4.91
3346	11.8	3346	17.88	3346	4.06	3346	4.91
3344	11.8	3344	17.91	3344	4.08	3344	4.91
3342	11.8	3342	17.95	3342	4.11	3342	4.91
3340	11.8	3340	17.99	3340	4.14	3340	4.92
3338	11.8	3338	18.03	3338	4.17	3338	4.92
3336	11.81	3336	18.06	3336	4.2	3336	4.92
3334	11.81	3334	18.1	3334	4.23	3334	4.93
3332	11.81	3332	18.14	3332	4.26	3332	4.93
3330	11.82	3330	18.18	3330	4.29	3330	4.94
3328	11.82	3328	18.21	3328	4.32	3328	4.94
3326	11.83	3326	18.25	3326	4.35	3326	4.95
3324	11.83	3324	18.28	3324	4.37	3324	4.95
3322	11.84	3322	18.31	3322	4.4	3322	4.96
3320	11.84	3320	18.34	3320	4.42	3320	4.96
3318	11.84	3318	18.37	3318	4.45	3318	4.97
3316	11.85	3316	18.4	3316	4.48	3316	4.97
3314	11.85	3314	18.42	3314	4.5	3314	4.98
3312	11.85	3312	18.44	3312	4.52	3312	4.98
3310	11.85	3310	18.46	3310	4.54	3310	4.99
3308	11.85	3308	18.47	3308	4.57	3308	4.99
3306	11.85	3306	18.49	3306	4.59	3306	4.99
3304	11.86	3304	18.51	3304	4.61	3304	5
3302	11.86	3302	18.53	3302	4.63	3302	5
3300	11.86	3300	18.55	3300	4.66	3300	5.01
3298	11.87	3298	18.57	3298	4.68	3298	5.02
3296	11.87	3296	18.59	3296	4.7	3296	5.02
3294	11.88	3294	18.61	3294	4.73	3294	5.03
3292	11.88	3292	18.63	3292	4.75	3292	5.03
3290	11.89	3290	18.65	3290	4.77	3290	5.04
3288	11.9	3288	18.67	3288	4.8	3288	5.05
3286	11.9	3286	18.69	3286	4.82	3286	5.06
3284	11.91	3284	18.71	3284	4.84	3284	5.06
3282	11.92	3282	18.73	3282	4.86	3282	5.07
3280	11.93	3280	18.74	3280	4.89	3280	5.08
3278	11.94	3278	18.76	3278	4.91	3278	5.09
3276	11.95	3276	18.77	3276	4.93	3276	5.1
3274	11.96	3274	18.78	3274	4.95	3274	5.11
3272	11.97	3272	18.8	3272	4.97	3272	5.12
3270	11.98	3270	18.81	3270	4.99	3270	5.13
3268	12	3268	18.82	3268	5.01	3268	5.14
3266	12.01	3266	18.84	3266	5.03	3266	5.15
3264	12.02	3264	18.86	3264	5.06	3264	5.16
3262	12.04	3262	18.87	3262	5.08	3262	5.17
3260	12.05	3260	18.89	3260	5.1	3260	5.19
3258	12.06	3258	18.9	3258	5.12	3258	5.2
3256	12.08	3256	18.92	3256	5.14	3256	5.21
3254	12.09	3254	18.93	3254	5.17	3254	5.22
3252	12.11	3252	18.95	3252	5.19	3252	5.24
3250	12.12	3250	18.96	3250	5.22	3250	5.25
3248	12.14	3248	18.97	3248	5.24	3248	5.26
3246	12.15	3246	18.99	3246	5.27	3246	5.27
3244	12.17	3244	19	3244	5.29	3244	5.29
3242	12.18	3242	19.02	3242	5.32	3242	5.3
3240	12.2	3240	19.04	3240	5.35	3240	5.31
3238	12.22	3238	19.05	3238	5.37	3238	5.33
3236	12.23	3236	19.07	3236	5.4	3236	5.34
3234	12.25	3234	19.09	3234	5.43	3234	5.36
3232	12.27	3232	19.11	3232	5.46	3232	5.37
3230	12.28	3230	19.12	3230	5.49	3230	5.38
3228	12.3	3228	19.14	3228	5.52	3228	5.4
3226	12.32	3226	19.16	3226	5.55	3226	5.41
3224	12.33	3224	19.18	3224	5.59	3224	5.42
3222	12.35	3222	19.2	3222	5.62	3222	5.43
3220	12.37	3220	19.21	3220	5.65	3220	5.45
3218	12.38	3218	19.23	3218	5.68	3218	5.46
3216	12.39	3216	19.25	3216	5.72	3216	5.47
3214	12.41	3214	19.26	3214	5.75	3214	5.48
3212	12.42	3212	19.27	3212	5.78	3212	5.5
3210	12.43	3210	19.29	3210	5.82	3210	5.51
3208	12.45	3208	19.3	3208	5.85	3208	5.52
3206	12.46	3206	19.32	3206	5.89	3206	5.54
3204	12.48	3204	19.33	3204	5.92	3204	5.55
3202	12.5	3202	19.35	3202	5.96	3202	5.57
3200	12.51	3200	19.37	3200	6	3200	5.59
3198	12.53	3198	19.38	3198	6.03	3198	5.6
3196	12.55	3196	19.4	3196	6.07	3196	5.62
3194	12.57	3194	19.41	3194	6.11	3194	5.64
3192	12.59	3192	19.43	3192	6.15	3192	5.65
3190	12.61	3190	19.45	3190	6.19	3190	5.67
3188	12.63	3188	19.47	3188	6.23	3188	5.69
3186	12.65	3186	19.49	3186	6.27	3186	5.71
3184	12.67	3184	19.51	3184	6.31	3184	5.73
3182	12.69	3182	19.52	3182	6.35	3182	5.75
3180	12.72	3180	19.54	3180	6.39	3180	5.77
3178	12.74	3178	19.56	3178	6.43	3178	5.8
3176	12.76	3176	19.58	3176	6.47	3176	5.82
3174	12.78	3174	19.6	3174	6.51	3174	5.84
3172	12.81	3172	19.61	3172	6.56	3172	5.86
3170	12.83	3170	19.63	3170	6.6	3170	5.88
3168	12.85	3168	19.65	3168	6.64	3168	5.91
3166	12.88	3166	19.67	3166	6.68	3166	5.93
3164	12.9	3164	19.68	3164	6.72	3164	5.95
3162	12.92	3162	19.7	3162	6.76	3162	5.97
3160	12.94	3160	19.71	3160	6.8	3160	5.99
3158	12.96	3158	19.73	3158	6.84	3158	6.02
3156	12.99	3156	19.74	3156	6.88	3156	6.04
3154	13.01	3154	19.76	3154	6.92	3154	6.06
3152	13.03	3152	19.77	3152	6.96	3152	6.08
3150	13.05	3150	19.79	3150	7	3150	6.1
3148	13.06	3148	19.8	3148	7.04	3148	6.12
3146	13.08	3146	19.82	3146	7.08	3146	6.14
3144	13.1	3144	19.84	3144	7.12	3144	6.16
3142	13.12	3142	19.85	3142	7.16	3142	6.18
3140	13.14	3140	19.87	3140	7.21	3140	6.2
3138	13.16	3138	19.89	3138	7.25	3138	6.21
3136	13.18	3136	19.9	3136	7.29	3136	6.23
3134	13.19	3134	19.92	3134	7.33	3134	6.25
3132	13.21	3132	19.93	3132	7.37	3132	6.26
3130	13.22	3130	19.95	3130	7.41	3130	6.27
3128	13.23	3128	19.96	3128	7.44	3128	6.28
3126	13.24	3126	19.98	3126	7.48	3126	6.29
3124	13.24	3124	19.99	3124	7.51	3124	6.3
3122	13.25	3122	20	3122	7.55	3122	6.31
3120	13.25	3120	20	3120	7.58	3120	6.31
3118	13.25	3118	20.01	3118	7.62	3118	6.31
3116	13.25	3116	20.02	3116	7.65	3116	6.31
3114	13.24	3114	20.03	3114	7.68	3114	6.31
3112	13.24	3112	20.04	3112	7.72	3112	6.31
3110	13.23	3110	20.06	3110	7.75	3110	6.31
3108	13.23	3108	20.07	3108	7.79	3108	6.31
3106	13.23	3106	20.08	3106	7.82	3106	6.3
3104	13.22	3104	20.1	3104	7.85	3104	6.3
3102	13.21	3102	20.11	3102	7.88	3102	6.29
3100	13.2	3100	20.12	3100	7.92	3100	6.29
3098	13.2	3098	20.13	3098	7.95	3098	6.28
3096	13.19	3096	20.14	3096	7.98	3096	6.28
3094	13.18	3094	20.15	3094	8.01	3094	6.27
3092	13.18	3092	20.16	3092	8.04	3092	6.27
3090	13.17	3090	20.17	3090	8.07	3090	6.27
3088	13.17	3088	20.18	3088	8.1	3088	6.26
3086	13.16	3086	20.19	3086	8.13	3086	6.26
3084	13.16	3084	20.19	3084	8.16	3084	6.26
3082	13.16	3082	20.2	3082	8.19	3082	6.27
3080	13.16	3080	20.21	3080	8.23	3080	6.27
3078	13.16	3078	20.23	3078	8.26	3078	6.28
3076	13.17	3076	20.24	3076	8.29	3076	6.28
3074	13.18	3074	20.26	3074	8.32	3074	6.29
3072	13.19	3072	20.27	3072	8.35	3072	6.31
3070	13.2	3070	20.28	3070	8.38	3070	6.32
3068	13.22	3068	20.3	3068	8.41	3068	6.33
3066	13.23	3066	20.31	3066	8.44	3066	6.35
3064	13.25	3064	20.33	3064	8.47	3064	6.37
3062	13.27	3062	20.34	3062	8.5	3062	6.4
3060	13.3	3060	20.35	3060	8.53	3060	6.42
3058	13.32	3058	20.37	3058	8.56	3058	6.45
3056	13.34	3056	20.38	3056	8.59	3056	6.48
3054	13.37	3054	20.39	3054	8.61	3054	6.5
3052	13.39	3052	20.4	3052	8.64	3052	6.53
3050	13.42	3050	20.41	3050	8.67	3050	6.56
3048	13.45	3048	20.42	3048	8.69	3048	6.6
3046	13.48	3046	20.43	3046	8.72	3046	6.63
3044	13.51	3044	20.45	3044	8.74	3044	6.66
3042	13.54	3042	20.46	3042	8.77	3042	6.7
3040	13.57	3040	20.47	3040	8.79	3040	6.73
3038	13.6	3038	20.48	3038	8.82	3038	6.76
3036	13.63	3036	20.49	3036	8.84	3036	6.79
3034	13.66	3034	20.51	3034	8.86	3034	6.83
3032	13.69	3032	20.52	3032	8.89	3032	6.86
3030	13.71	3030	20.53	3030	8.91	3030	6.89
3028	13.74	3028	20.55	3028	8.93	3028	6.92
3026	13.76	3026	20.56	3026	8.96	3026	6.94
3024	13.78	3024	20.57	3024	8.98	3024	6.97
3022	13.8	3022	20.57	3022	9	3022	6.99
3020	13.82	3020	20.58	3020	9.02	3020	7.01
3018	13.84	3018	20.59	3018	9.04	3018	7.03
3016	13.85	3016	20.59	3016	9.06	3016	7.05
3014	13.86	3014	20.6	3014	9.08	3014	7.06
3012	13.87	3012	20.61	3012	9.1	3012	7.07
3010	13.87	3010	20.61	3010	9.12	3010	7.08
3008	13.87	3008	20.62	3008	9.14	3008	7.08
3006	13.87	3006	20.63	3006	9.16	3006	7.08
3004	13.86	3004	20.63	3004	9.18	3004	7.07
3002	13.85	3002	20.64	3002	9.2	3002	7.06
3000	13.84	3000	20.64	3000	9.22	3000	7.05
2998	13.82	2998	20.65	2998	9.24	2998	7.03
2996	13.8	2996	20.66	2996	9.26	2996	7.01
2994	13.78	2994	20.66	2994	9.28	2994	6.99
2992	13.76	2992	20.67	2992	9.3	2992	6.96
2990	13.74	2990	20.67	2990	9.32	2990	6.94
2988	13.72	2988	20.68	2988	9.34	2988	6.91
2986	13.7	2986	20.68	2986	9.36	2986	6.89
2984	13.68	2984	20.69	2984	9.38	2984	6.87
2982	13.66	2982	20.69	2982	9.4	2982	6.85
2980	13.65	2980	20.69	2980	9.41	2980	6.83
2978	13.63	2978	20.69	2978	9.42	2978	6.81
2976	13.61	2976	20.69	2976	9.44	2976	6.79
2974	13.6	2974	20.69	2974	9.45	2974	6.78
2972	13.59	2972	20.69	2972	9.46	2972	6.76
2970	13.57	2970	20.69	2970	9.48	2970	6.75
2968	13.56	2968	20.69	2968	9.5	2968	6.73
2966	13.56	2966	20.7	2966	9.52	2966	6.72
2964	13.55	2964	20.7	2964	9.54	2964	6.71
2962	13.55	2962	20.71	2962	9.56	2962	6.71
2960	13.55	2960	20.72	2960	9.58	2960	6.7
2958	13.55	2958	20.73	2958	9.6	2958	6.7
2956	13.55	2956	20.74	2956	9.62	2956	6.7
2954	13.56	2954	20.74	2954	9.63	2954	6.7
2952	13.56	2952	20.75	2952	9.65	2952	6.7
2950	13.57	2950	20.75	2950	9.66	2950	6.69
2948	13.58	2948	20.75	2948	9.68	2948	6.69
2946	13.58	2946	20.75	2946	9.69	2946	6.68
2944	13.59	2944	20.75	2944	9.71	2944	6.68
2942	13.6	2942	20.74	2942	9.72	2942	6.67
2940	13.61	2940	20.73	2940	9.74	2940	6.66
2938	13.62	2938	20.73	2938	9.76	2938	6.65
2936	13.63	2936	20.72	2936	9.77	2936	6.65
2934	13.65	2934	20.72	2934	9.79	2934	6.66
2932	13.68	2932	20.72	2932	9.81	2932	6.67
2930	13.71	2930	20.72	2930	9.83	2930	6.69
2928	13.74	2928	20.73	2928	9.85	2928	6.72
2926	13.78	2926	20.74	2926	9.87	2926	6.76
2924	13.82	2924	20.77	2924	9.88	2924	6.81
2922	13.87	2922	20.79	2922	9.9	2922	6.88
2920	13.91	2920	20.82	2920	9.92	2920	6.94
2918	13.96	2918	20.85	2918	9.93	2918	7.02
2916	14	2916	20.88	2916	9.95	2916	7.09
2914	14.05	2914	20.9	2914	9.96	2914	7.17
2912	14.09	2912	20.93	2912	9.97	2912	7.24
2910	14.12	2910	20.95	2910	9.99	2910	7.31
2908	14.16	2908	20.97	2908	10	2908	7.37
2906	14.19	2906	20.99	2906	10.01	2906	7.42
2904	14.22	2904	21	2904	10.02	2904	7.47
2902	14.24	2902	21.02	2902	10.03	2902	7.51
2900	14.26	2900	21.04	2900	10.04	2900	7.55
2898	14.28	2898	21.05	2898	10.06	2898	7.58
2896	14.29	2896	21.06	2896	10.07	2896	7.6
2894	14.3	2894	21.07	2894	10.08	2894	7.62
2892	14.3	2892	21.08	2892	10.09	2892	7.63
2890	14.3	2890	21.09	2890	10.1	2890	7.63
2888	14.3	2888	21.1	2888	10.11	2888	7.64
2886	14.3	2886	21.11	2886	10.12	2886	7.64
2884	14.3	2884	21.12	2884	10.13	2884	7.64
2882	14.3	2882	21.12	2882	10.14	2882	7.64
2880	14.3	2880	21.12	2880	10.14	2880	7.65
2878	14.31	2878	21.12	2878	10.15	2878	7.67
2876	14.32	2876	21.12	2876	10.16	2876	7.69
2874	14.34	2874	21.12	2874	10.16	2874	7.72
2872	14.37	2872	21.12	2872	10.17	2872	7.76
2870	14.41	2870	21.12	2870	10.18	2870	7.8
2868	14.45	2868	21.12	2868	10.19	2868	7.85
2866	14.49	2866	21.12	2866	10.2	2866	7.9
2864	14.54	2864	21.13	2864	10.21	2864	7.95
2862	14.59	2862	21.13	2862	10.22	2862	8
2860	14.64	2860	21.14	2860	10.23	2860	8.05
2858	14.69	2858	21.15	2858	10.25	2858	8.1
2856	14.74	2856	21.17	2856	10.26	2856	8.16
2854	14.78	2854	21.19	2854	10.28	2854	8.22
2852	14.82	2852	21.21	2852	10.29	2852	8.28
2850	14.86	2850	21.23	2850	10.31	2850	8.34
2848	14.89	2848	21.26	2848	10.32	2848	8.41
2846	14.92	2846	21.28	2846	10.33	2846	8.47
2844	14.94	2844	21.3	2844	10.34	2844	8.53
2842	14.97	2842	21.33	2842	10.35	2842	8.59
2840	14.99	2840	21.35	2840	10.37	2840	8.65
2838	15.02	2838	21.36	2838	10.38	2838	8.7
2836	15.04	2836	21.38	2836	10.39	2836	8.74
2834	15.06	2834	21.39	2834	10.4	2834	8.78
2832	15.08	2832	21.4	2832	10.4	2832	8.81
2830	15.1	2830	21.41	2830	10.41	2830	8.84
2828	15.12	2828	21.42	2828	10.42	2828	8.87
2826	15.14	2826	21.43	2826	10.43	2826	8.9
2824	15.16	2824	21.44	2824	10.43	2824	8.93
2822	15.17	2822	21.44	2822	10.44	2822	8.95
2820	15.18	2820	21.45	2820	10.44	2820	8.98
2818	15.2	2818	21.45	2818	10.45	2818	9
2816	15.21	2816	21.45	2816	10.45	2816	9.03
2814	15.22	2814	21.45	2814	10.45	2814	9.05
2812	15.23	2812	21.45	2812	10.46	2812	9.07
2810	15.24	2810	21.45	2810	10.46	2810	9.1
2808	15.26	2808	21.46	2808	10.47	2808	9.12
2806	15.27	2806	21.46	2806	10.47	2806	9.15
2804	15.28	2804	21.46	2804	10.48	2804	9.17
2802	15.3	2802	21.47	2802	10.48	2802	9.2
2800	15.31	2800	21.47	2800	10.49	2800	9.22
2798	15.33	2798	21.48	2798	10.49	2798	9.25
2796	15.34	2796	21.48	2796	10.5	2796	9.28
2794	15.36	2794	21.49	2794	10.51	2794	9.31
2792	15.38	2792	21.5	2792	10.52	2792	9.34
2790	15.39	2790	21.51	2790	10.52	2790	9.37
2788	15.41	2788	21.52	2788	10.53	2788	9.39
2786	15.43	2786	21.52	2786	10.54	2786	9.42
2784	15.45	2784	21.53	2784	10.55	2784	9.45
2782	15.46	2782	21.54	2782	10.55	2782	9.48
2780	15.48	2780	21.54	2780	10.56	2780	9.52
2778	15.5	2778	21.55	2778	10.57	2778	9.55
2776	15.51	2776	21.56	2776	10.57	2776	9.58
2774	15.53	2774	21.57	2774	10.58	2774	9.61
2772	15.55	2772	21.57	2772	10.59	2772	9.64
2770	15.56	2770	21.58	2770	10.59	2770	9.67
2768	15.58	2768	21.59	2768	10.6	2768	9.69
2766	15.59	2766	21.6	2766	10.61	2766	9.72
2764	15.61	2764	21.61	2764	10.62	2764	9.75
2762	15.63	2762	21.61	2762	10.62	2762	9.78
2760	15.64	2760	21.62	2760	10.63	2760	9.81
2758	15.66	2758	21.63	2758	10.64	2758	9.84
2756	15.67	2756	21.64	2756	10.65	2756	9.87
2754	15.69	2754	21.65	2754	10.65	2754	9.9
2752	15.7	2752	21.66	2752	10.66	2752	9.93
2750	15.72	2750	21.67	2750	10.67	2750	9.96
2748	15.74	2748	21.68	2748	10.68	2748	9.99
2746	15.75	2746	21.69	2746	10.69	2746	10.01
2744	15.77	2744	21.7	2744	10.69	2744	10.04
2742	15.79	2742	21.71	2742	10.7	2742	10.07
2740	15.81	2740	21.72	2740	10.71	2740	10.1
2738	15.82	2738	21.73	2738	10.72	2738	10.13
2736	15.84	2736	21.74	2736	10.72	2736	10.16
2734	15.85	2734	21.75	2734	10.73	2734	10.18
2732	15.87	2732	21.75	2732	10.73	2732	10.21
2730	15.88	2730	21.76	2730	10.74	2730	10.24
2728	15.89	2728	21.77	2728	10.74	2728	10.26
2726	15.9	2726	21.77	2726	10.75	2726	10.29
2724	15.91	2724	21.78	2724	10.75	2724	10.31
2722	15.92	2722	21.79	2722	10.75	2722	10.33
2720	15.92	2720	21.79	2720	10.75	2720	10.35
2718	15.93	2718	21.79	2718	10.75	2718	10.38
2716	15.94	2716	21.8	2716	10.75	2716	10.4
2714	15.95	2714	21.8	2714	10.76	2714	10.42
2712	15.96	2712	21.81	2712	10.76	2712	10.44
2710	15.97	2710	21.81	2710	10.76	2710	10.46
2708	15.97	2708	21.82	2708	10.76	2708	10.47
2706	15.98	2706	21.82	2706	10.76	2706	10.49
2704	15.99	2704	21.83	2704	10.77	2704	10.51
2702	16	2702	21.83	2702	10.77	2702	10.53
2700	16	2700	21.84	2700	10.77	2700	10.54
2698	16.01	2698	21.84	2698	10.78	2698	10.56
2696	16.02	2696	21.85	2696	10.78	2696	10.57
2694	16.02	2694	21.85	2694	10.78	2694	10.59
2692	16.03	2692	21.86	2692	10.78	2692	10.6
2690	16.03	2690	21.87	2690	10.79	2690	10.61
2688	16.04	2688	21.87	2688	10.79	2688	10.62
2686	16.04	2686	21.88	2686	10.79	2686	10.63
2684	16.05	2684	21.88	2684	10.8	2684	10.64
2682	16.05	2682	21.89	2682	10.8	2682	10.65
2680	16.06	2680	21.89	2680	10.8	2680	10.66
2678	16.06	2678	21.9	2678	10.8	2678	10.67
2676	16.06	2676	21.91	2676	10.81	2676	10.68
2674	16.07	2674	21.91	2674	10.81	2674	10.69
2672	16.07	2672	21.92	2672	10.81	2672	10.7
2670	16.07	2670	21.92	2670	10.81	2670	10.71
2668	16.08	2668	21.92	2668	10.81	2668	10.72
2666	16.08	2666	21.93	2666	10.82	2666	10.73
2664	16.09	2664	21.94	2664	10.82	2664	10.74
2662	16.09	2662	21.94	2662	10.82	2662	10.75
2660	16.1	2660	21.95	2660	10.82	2660	10.76
2658	16.1	2658	21.95	2658	10.83	2658	10.78
2656	16.11	2656	21.95	2656	10.83	2656	10.79
2654	16.12	2654	21.96	2654	10.83	2654	10.8
2652	16.13	2652	21.96	2652	10.84	2652	10.82
2650	16.14	2650	21.97	2650	10.84	2650	10.83
2648	16.15	2648	21.97	2648	10.84	2648	10.85
2646	16.16	2646	21.98	2646	10.85	2646	10.87
2644	16.17	2644	21.99	2644	10.85	2644	10.89
2642	16.17	2642	21.99	2642	10.85	2642	10.9
2640	16.18	2640	22	2640	10.86	2640	10.92
2638	16.19	2638	22	2638	10.86	2638	10.94
2636	16.2	2636	22	2636	10.86	2636	10.96
2634	16.21	2634	22	2634	10.86	2634	10.97
2632	16.22	2632	22.01	2632	10.86	2632	10.99
2630	16.22	2630	22.01	2630	10.86	2630	11.01
2628	16.23	2628	22.01	2628	10.86	2628	11.02
2626	16.24	2626	22.01	2626	10.86	2626	11.04
2624	16.24	2624	22.01	2624	10.85	2624	11.06
2622	16.25	2622	22	2622	10.85	2622	11.07
2620	16.25	2620	22	2620	10.85	2620	11.09
2618	16.26	2618	22	2618	10.85	2618	11.11
2616	16.27	2616	22	2616	10.85	2616	11.13
2614	16.27	2614	22	2614	10.84	2614	11.14
2612	16.28	2612	22	2612	10.84	2612	11.16
2610	16.28	2610	22	2610	10.84	2610	11.18
2608	16.29	2608	22	2608	10.84	2608	11.2
2606	16.3	2606	22	2606	10.84	2606	11.22
2604	16.31	2604	22	2604	10.84	2604	11.24
2602	16.32	2602	22	2602	10.84	2602	11.26
2600	16.32	2600	22.01	2600	10.84	2600	11.27
2598	16.33	2598	22.01	2598	10.84	2598	11.29
2596	16.34	2596	22.01	2596	10.84	2596	11.31
2594	16.35	2594	22.02	2594	10.84	2594	11.33
2592	16.36	2592	22.02	2592	10.84	2592	11.34
2590	16.37	2590	22.02	2590	10.84	2590	11.36
2588	16.37	2588	22.03	2588	10.84	2588	11.38
2586	16.38	2586	22.03	2586	10.84	2586	11.39
2584	16.39	2584	22.04	2584	10.85	2584	11.41
2582	16.4	2582	22.04	2582	10.85	2582	11.42
2580	16.4	2580	22.05	2580	10.85	2580	11.44
2578	16.41	2578	22.05	2578	10.85	2578	11.45
2576	16.41	2576	22.05	2576	10.85	2576	11.47
2574	16.42	2574	22.06	2574	10.85	2574	11.48
2572	16.43	2572	22.06	2572	10.85	2572	11.49
2570	16.43	2570	22.06	2570	10.85	2570	11.51
2568	16.44	2568	22.07	2568	10.85	2568	11.52
2566	16.45	2566	22.07	2566	10.85	2566	11.53
2564	16.45	2564	22.08	2564	10.85	2564	11.55
2562	16.46	2562	22.08	2562	10.85	2562	11.56
2560	16.47	2560	22.09	2560	10.85	2560	11.57
2558	16.48	2558	22.09	2558	10.85	2558	11.58
2556	16.48	2556	22.09	2556	10.85	2556	11.6
2554	16.49	2554	22.1	2554	10.85	2554	11.61
2552	16.5	2552	22.1	2552	10.86	2552	11.63
2550	16.5	2550	22.11	2550	10.86	2550	11.64
2548	16.51	2548	22.12	2548	10.86	2548	11.65
2546	16.52	2546	22.12	2546	10.86	2546	11.66
2544	16.53	2544	22.13	2544	10.86	2544	11.68
2542	16.54	2542	22.13	2542	10.86	2542	11.69
2540	16.54	2540	22.13	2540	10.86	2540	11.7
2538	16.55	2538	22.14	2538	10.86	2538	11.71
2536	16.56	2536	22.14	2536	10.86	2536	11.73
2534	16.56	2534	22.14	2534	10.86	2534	11.74
2532	16.56	2532	22.14	2532	10.86	2532	11.75
2530	16.57	2530	22.14	2530	10.85	2530	11.76
2528	16.57	2528	22.14	2528	10.85	2528	11.76
2526	16.57	2526	22.14	2526	10.84	2526	11.77
2524	16.57	2524	22.13	2524	10.84	2524	11.78
2522	16.57	2522	22.13	2522	10.84	2522	11.79
2520	16.57	2520	22.13	2520	10.83	2520	11.8
2518	16.57	2518	22.13	2518	10.83	2518	11.81
2516	16.58	2516	22.13	2516	10.83	2516	11.83
2514	16.58	2514	22.13	2514	10.83	2514	11.84
2512	16.58	2512	22.13	2512	10.82	2512	11.85
2510	16.59	2510	22.13	2510	10.82	2510	11.86
2508	16.59	2508	22.13	2508	10.82	2508	11.87
2506	16.6	2506	22.13	2506	10.82	2506	11.88
2504	16.61	2504	22.13	2504	10.82	2504	11.9
2502	16.61	2502	22.13	2502	10.82	2502	11.91
2500	16.62	2500	22.13	2500	10.82	2500	11.92
2498	16.62	2498	22.14	2498	10.82	2498	11.94
2496	16.63	2496	22.14	2496	10.82	2496	11.95
2494	16.63	2494	22.14	2494	10.82	2494	11.96
2492	16.64	2492	22.14	2492	10.82	2492	11.98
2490	16.64	2490	22.15	2490	10.82	2490	11.99
2488	16.65	2488	22.15	2488	10.82	2488	12
2486	16.65	2486	22.16	2486	10.82	2486	12.02
2484	16.66	2484	22.16	2484	10.82	2484	12.03
2482	16.67	2482	22.16	2482	10.82	2482	12.04
2480	16.67	2480	22.17	2480	10.82	2480	12.06
2478	16.68	2478	22.17	2478	10.82	2478	12.07
2476	16.68	2476	22.18	2476	10.82	2476	12.08
2474	16.69	2474	22.18	2474	10.82	2474	12.1
2472	16.7	2472	22.19	2472	10.83	2472	12.11
2470	16.7	2470	22.19	2470	10.83	2470	12.13
2468	16.71	2468	22.2	2468	10.83	2468	12.14
2466	16.72	2466	22.2	2466	10.83	2466	12.15
2464	16.72	2464	22.21	2464	10.83	2464	12.17
2462	16.73	2462	22.22	2462	10.83	2462	12.18
2460	16.73	2460	22.22	2460	10.84	2460	12.19
2458	16.74	2458	22.23	2458	10.84	2458	12.21
2456	16.75	2456	22.24	2456	10.84	2456	12.22
2454	16.76	2454	22.25	2454	10.85	2454	12.24
2452	16.77	2452	22.25	2452	10.85	2452	12.25
2450	16.77	2450	22.26	2450	10.85	2450	12.26
2448	16.78	2448	22.27	2448	10.86	2448	12.28
2446	16.79	2446	22.28	2446	10.86	2446	12.29
2444	16.8	2444	22.28	2444	10.86	2444	12.3
2442	16.8	2442	22.29	2442	10.86	2442	12.31
2440	16.81	2440	22.3	2440	10.86	2440	12.32
2438	16.81	2438	22.3	2438	10.86	2438	12.33
2436	16.81	2436	22.31	2436	10.86	2436	12.34
2434	16.81	2434	22.31	2434	10.86	2434	12.35
2432	16.81	2432	22.31	2432	10.86	2432	12.35
2430	16.81	2430	22.31	2430	10.86	2430	12.36
2428	16.81	2428	22.32	2428	10.86	2428	12.37
2426	16.81	2426	22.32	2426	10.85	2426	12.38
2424	16.81	2424	22.32	2424	10.85	2424	12.39
2422	16.82	2422	22.32	2422	10.85	2422	12.39
2420	16.82	2420	22.33	2420	10.85	2420	12.4
2418	16.82	2418	22.33	2418	10.85	2418	12.41
2416	16.82	2416	22.34	2416	10.85	2416	12.42
2414	16.83	2414	22.34	2414	10.85	2414	12.43
2412	16.83	2412	22.35	2412	10.85	2412	12.44
2410	16.83	2410	22.35	2410	10.85	2410	12.45
2408	16.83	2408	22.36	2408	10.86	2408	12.46
2406	16.84	2406	22.36	2406	10.86	2406	12.47
2404	16.84	2404	22.37	2404	10.86	2404	12.48
2402	16.84	2402	22.38	2402	10.86	2402	12.49
2400	16.84	2400	22.38	2400	10.86	2400	12.5
2398	16.85	2398	22.39	2398	10.86	2398	12.5
2396	16.85	2396	22.39	2396	10.86	2396	12.51
2394	16.85	2394	22.4	2394	10.86	2394	12.51
2392	16.85	2392	22.4	2392	10.86	2392	12.52
2390	16.86	2390	22.41	2390	10.86	2390	12.52
2388	16.86	2388	22.41	2388	10.85	2388	12.53
2386	16.87	2386	22.42	2386	10.84	2386	12.53
2384	16.87	2384	22.43	2384	10.83	2384	12.54
2382	16.87	2382	22.43	2382	10.81	2382	12.55
2380	16.87	2380	22.43	2380	10.8	2380	12.56
2378	16.87	2378	22.43	2378	10.78	2378	12.57
2376	16.87	2376	22.43	2376	10.77	2376	12.58
2374	16.87	2374	22.41	2374	10.75	2374	12.58
2372	16.86	2372	22.39	2372	10.74	2372	12.59
2370	16.85	2370	22.36	2370	10.74	2370	12.6
2368	16.83	2368	22.34	2368	10.74	2368	12.61
2366	16.82	2366	22.33	2366	10.76	2366	12.61
2364	16.81	2364	22.35	2364	10.78	2364	12.62
2362	16.81	2362	22.39	2362	10.81	2362	12.62
2360	16.83	2360	22.44	2360	10.84	2360	12.62
2358	16.85	2358	22.49	2358	10.86	2358	12.62
2356	16.88	2356	22.52	2356	10.88	2356	12.62
2354	16.91	2354	22.54	2354	10.89	2354	12.62
2352	16.93	2352	22.53	2352	10.89	2352	12.62
2350	16.94	2350	22.51	2350	10.89	2350	12.63
2348	16.94	2348	22.49	2348	10.88	2348	12.63
2346	16.94	2346	22.47	2346	10.88	2346	12.64
2344	16.93	2344	22.45	2344	10.87	2344	12.65
2342	16.91	2342	22.45	2342	10.87	2342	12.66
2340	16.9	2340	22.47	2340	10.87	2340	12.66
2338	16.89	2338	22.5	2338	10.87	2338	12.67
2336	16.89	2336	22.53	2336	10.87	2336	12.67
2334	16.89	2334	22.57	2334	10.87	2334	12.68
2332	16.89	2332	22.61	2332	10.87	2332	12.69
2330	16.9	2330	22.64	2330	10.87	2330	12.69
2328	16.9	2328	22.66	2328	10.87	2328	12.69
2326	16.9	2326	22.68	2326	10.87	2326	12.69
2324	16.9	2324	22.68	2324	10.87	2324	12.69
2322	16.9	2322	22.69	2322	10.87	2322	12.68
2320	16.9	2320	22.68	2320	10.87	2320	12.68
2318	16.9	2318	22.67	2318	10.87	2318	12.67
2316	16.9	2316	22.66	2316	10.87	2316	12.67
2314	16.9	2314	22.65	2314	10.87	2314	12.67
2312	16.9	2312	22.64	2312	10.87	2312	12.66
2310	16.9	2310	22.63	2310	10.87	2310	12.66
2308	16.9	2308	22.62	2308	10.87	2308	12.66
2306	16.89	2306	22.62	2306	10.87	2306	12.65
2304	16.89	2304	22.63	2304	10.87	2304	12.65
2302	16.89	2302	22.63	2302	10.86	2302	12.65
2300	16.89	2300	22.64	2300	10.86	2300	12.65
2298	16.89	2298	22.65	2298	10.86	2298	12.65
2296	16.89	2296	22.66	2296	10.86	2296	12.65
2294	16.88	2294	22.67	2294	10.86	2294	12.65
2292	16.88	2292	22.68	2292	10.86	2292	12.65
2290	16.88	2290	22.69	2290	10.86	2290	12.65
2288	16.88	2288	22.7	2288	10.86	2288	12.65
2286	16.88	2286	22.71	2286	10.86	2286	12.66
2284	16.88	2284	22.72	2284	10.86	2284	12.66
2282	16.88	2282	22.72	2282	10.86	2282	12.66
2280	16.88	2280	22.73	2280	10.86	2280	12.66
2278	16.87	2278	22.73	2278	10.86	2278	12.66
2276	16.87	2276	22.73	2276	10.86	2276	12.66
2274	16.87	2274	22.74	2274	10.86	2274	12.66
2272	16.87	2272	22.74	2272	10.86	2272	12.66
2270	16.87	2270	22.75	2270	10.86	2270	12.66
2268	16.87	2268	22.76	2268	10.86	2268	12.66
2266	16.88	2266	22.77	2266	10.86	2266	12.66
2264	16.88	2264	22.78	2264	10.86	2264	12.66
2262	16.88	2262	22.78	2262	10.86	2262	12.66
2260	16.88	2260	22.79	2260	10.86	2260	12.66
2258	16.88	2258	22.8	2258	10.86	2258	12.66
2256	16.88	2256	22.81	2256	10.86	2256	12.66
2254	16.88	2254	22.82	2254	10.86	2254	12.66
2252	16.88	2252	22.83	2252	10.86	2252	12.65
2250	16.88	2250	22.84	2250	10.86	2250	12.65
2248	16.88	2248	22.85	2248	10.86	2248	12.65
2246	16.88	2246	22.85	2246	10.85	2246	12.64
2244	16.87	2244	22.86	2244	10.85	2244	12.64
2242	16.87	2242	22.86	2242	10.84	2242	12.63
2240	16.86	2240	22.86	2240	10.84	2240	12.62
2238	16.86	2238	22.86	2238	10.83	2238	12.61
2236	16.85	2236	22.86	2236	10.83	2236	12.6
2234	16.85	2234	22.86	2234	10.82	2234	12.6
2232	16.84	2232	22.86	2232	10.82	2232	12.59
2230	16.83	2230	22.87	2230	10.82	2230	12.58
2228	16.83	2228	22.87	2228	10.81	2228	12.57
2226	16.82	2226	22.87	2226	10.81	2226	12.56
2224	16.82	2224	22.87	2224	10.81	2224	12.56
2222	16.81	2222	22.88	2222	10.8	2222	12.55
2220	16.81	2220	22.88	2220	10.8	2220	12.54
2218	16.8	2218	22.89	2218	10.8	2218	12.54
2216	16.8	2216	22.89	2216	10.8	2216	12.53
2214	16.8	2214	22.89	2214	10.79	2214	12.52
2212	16.79	2212	22.9	2212	10.79	2212	12.52
2210	16.79	2210	22.9	2210	10.79	2210	12.51
2208	16.78	2208	22.91	2208	10.78	2208	12.5
2206	16.78	2206	22.91	2206	10.78	2206	12.5
2204	16.78	2204	22.92	2204	10.78	2204	12.49
2202	16.78	2202	22.92	2202	10.77	2202	12.49
2200	16.77	2200	22.93	2200	10.77	2200	12.49
2198	16.77	2198	22.93	2198	10.77	2198	12.48
2196	16.77	2196	22.94	2196	10.76	2196	12.47
2194	16.77	2194	22.94	2194	10.76	2194	12.47
2192	16.76	2192	22.94	2192	10.76	2192	12.46
2190	16.76	2190	22.95	2190	10.76	2190	12.46
2188	16.76	2188	22.95	2188	10.75	2188	12.46
2186	16.75	2186	22.96	2186	10.75	2186	12.45
2184	16.75	2184	22.96	2184	10.75	2184	12.45
2182	16.75	2182	22.97	2182	10.74	2182	12.45
2180	16.75	2180	22.97	2180	10.74	2180	12.44
2178	16.75	2178	22.98	2178	10.74	2178	12.44
2176	16.75	2176	22.98	2176	10.74	2176	12.44
2174	16.75	2174	22.99	2174	10.73	2174	12.44
2172	16.75	2172	22.99	2172	10.73	2172	12.44
2170	16.75	2170	23	2170	10.73	2170	12.44
2168	16.75	2168	23	2168	10.73	2168	12.44
2166	16.75	2166	23.01	2166	10.73	2166	12.44
2164	16.75	2164	23.02	2164	10.73	2164	12.43
2162	16.75	2162	23.02	2162	10.73	2162	12.43
2160	16.75	2160	23.03	2160	10.72	2160	12.43
2158	16.76	2158	23.03	2158	10.72	2158	12.43
2156	16.76	2156	23.04	2156	10.72	2156	12.43
2154	16.76	2154	23.04	2154	10.71	2154	12.43
2152	16.76	2152	23.05	2152	10.71	2152	12.43
2150	16.76	2150	23.05	2150	10.7	2150	12.43
2148	16.75	2148	23.05	2148	10.7	2148	12.43
2146	16.75	2146	23.05	2146	10.69	2146	12.42
2144	16.74	2144	23.05	2144	10.69	2144	12.42
2142	16.73	2142	23.05	2142	10.68	2142	12.42
2140	16.73	2140	23.05	2140	10.67	2140	12.41
2138	16.73	2138	23.05	2138	10.67	2138	12.41
2136	16.72	2136	23.05	2136	10.66	2136	12.41
2134	16.72	2134	23.05	2134	10.66	2134	12.41
2132	16.72	2132	23.06	2132	10.65	2132	12.41
2130	16.71	2130	23.06	2130	10.65	2130	12.41
2128	16.71	2128	23.06	2128	10.65	2128	12.41
2126	16.71	2126	23.06	2126	10.64	2126	12.42
2124	16.71	2124	23.06	2124	10.64	2124	12.42
2122	16.71	2122	23.07	2122	10.63	2122	12.42
2120	16.71	2120	23.07	2120	10.63	2120	12.43
2118	16.71	2118	23.07	2118	10.63	2118	12.43
2116	16.71	2116	23.08	2116	10.62	2116	12.43
2114	16.71	2114	23.08	2114	10.62	2114	12.44
2112	16.71	2112	23.08	2112	10.62	2112	12.44
2110	16.71	2110	23.09	2110	10.62	2110	12.45
2108	16.71	2108	23.09	2108	10.61	2108	12.46
2106	16.72	2106	23.1	2106	10.61	2106	12.46
2104	16.72	2104	23.1	2104	10.61	2104	12.47
2102	16.72	2102	23.1	2102	10.61	2102	12.48
2100	16.72	2100	23.11	2100	10.61	2100	12.48
2098	16.72	2098	23.11	2098	10.61	2098	12.49
2096	16.72	2096	23.11	2096	10.6	2096	12.49
2094	16.72	2094	23.12	2094	10.6	2094	12.5
2092	16.72	2092	23.12	2092	10.6	2092	12.5
2090	16.72	2090	23.12	2090	10.6	2090	12.51
2088	16.72	2088	23.13	2088	10.6	2088	12.52
2086	16.72	2086	23.13	2086	10.6	2086	12.53
2084	16.72	2084	23.13	2084	10.6	2084	12.54
2082	16.73	2082	23.14	2082	10.6	2082	12.56
2080	16.73	2080	23.14	2080	10.6	2080	12.57
2078	16.74	2078	23.15	2078	10.6	2078	12.59
2076	16.75	2076	23.15	2076	10.6	2076	12.6
2074	16.75	2074	23.16	2074	10.61	2074	12.61
2072	16.76	2072	23.16	2072	10.61	2072	12.63
2070	16.76	2070	23.17	2070	10.61	2070	12.64
2068	16.76	2068	23.17	2068	10.61	2068	12.65
2066	16.76	2066	23.18	2066	10.61	2066	12.66
2064	16.76	2064	23.19	2064	10.61	2064	12.68
2062	16.77	2062	23.19	2062	10.62	2062	12.69
2060	16.77	2060	23.2	2060	10.62	2060	12.7
2058	16.78	2058	23.2	2058	10.62	2058	12.71
2056	16.79	2056	23.21	2056	10.62	2056	12.72
2054	16.8	2054	23.21	2054	10.62	2054	12.73
2052	16.8	2052	23.21	2052	10.62	2052	12.74
2050	16.8	2050	23.21	2050	10.62	2050	12.75
2048	16.8	2048	23.21	2048	10.62	2048	12.76
2046	16.8	2046	23.21	2046	10.61	2046	12.77
2044	16.8	2044	23.21	2044	10.61	2044	12.78
2042	16.8	2042	23.21	2042	10.61	2042	12.79
2040	16.8	2040	23.21	2040	10.61	2040	12.8
2038	16.8	2038	23.22	2038	10.62	2038	12.81
2036	16.81	2036	23.22	2036	10.62	2036	12.82
2034	16.81	2034	23.23	2034	10.62	2034	12.83
2032	16.81	2032	23.23	2032	10.62	2032	12.84
2030	16.81	2030	23.23	2030	10.63	2030	12.85
2028	16.82	2028	23.24	2028	10.63	2028	12.87
2026	16.82	2026	23.24	2026	10.63	2026	12.88
2024	16.82	2024	23.24	2024	10.63	2024	12.89
2022	16.83	2022	23.25	2022	10.63	2022	12.9
2020	16.83	2020	23.25	2020	10.64	2020	12.92
2018	16.83	2018	23.25	2018	10.64	2018	12.93
2016	16.83	2016	23.26	2016	10.64	2016	12.94
2014	16.84	2014	23.26	2014	10.64	2014	12.95
2012	16.84	2012	23.27	2012	10.65	2012	12.96
2010	16.84	2010	23.28	2010	10.65	2010	12.97
2008	16.85	2008	23.28	2008	10.66	2008	12.98
2006	16.85	2006	23.29	2006	10.67	2006	12.99
2004	16.85	2004	23.3	2004	10.67	2004	13
2002	16.85	2002	23.3	2002	10.67	2002	13.01
2000	16.85	2000	23.31	2000	10.68	2000	13.02
1998	16.85	1998	23.31	1998	10.68	1998	13.03
1996	16.85	1996	23.31	1996	10.68	1996	13.04
1994	16.86	1994	23.31	1994	10.68	1994	13.05
1992	16.86	1992	23.31	1992	10.69	1992	13.06
1990	16.87	1990	23.31	1990	10.69	1990	13.07
1988	16.87	1988	23.32	1988	10.7	1988	13.08
1986	16.87	1986	23.33	1986	10.7	1986	13.08
1984	16.88	1984	23.34	1984	10.71	1984	13.09
1982	16.88	1982	23.35	1982	10.72	1982	13.1
1980	16.88	1980	23.37	1980	10.73	1980	13.11
1978	16.89	1978	23.38	1978	10.74	1978	13.12
1976	16.89	1976	23.39	1976	10.75	1976	13.13
1974	16.89	1974	23.4	1974	10.76	1974	13.14
1972	16.9	1972	23.4	1972	10.77	1972	13.15
1970	16.9	1970	23.41	1970	10.77	1970	13.16
1968	16.9	1968	23.41	1968	10.78	1968	13.16
1966	16.91	1966	23.42	1966	10.78	1966	13.17
1964	16.91	1964	23.43	1964	10.79	1964	13.18
1962	16.91	1962	23.43	1962	10.79	1962	13.19
1960	16.91	1960	23.44	1960	10.79	1960	13.2
1958	16.91	1958	23.45	1958	10.8	1958	13.2
1956	16.91	1956	23.46	1956	10.8	1956	13.2
1954	16.91	1954	23.46	1954	10.8	1954	13.2
1952	16.9	1952	23.46	1952	10.8	1952	13.21
1950	16.9	1950	23.46	1950	10.8	1950	13.21
1948	16.9	1948	23.46	1948	10.81	1948	13.22
1946	16.9	1946	23.46	1946	10.81	1946	13.23
1944	16.9	1944	23.46	1944	10.81	1944	13.23
1942	16.9	1942	23.47	1942	10.81	1942	13.24
1940	16.9	1940	23.47	1940	10.81	1940	13.24
1938	16.9	1938	23.48	1938	10.81	1938	13.25
1936	16.9	1936	23.48	1936	10.82	1936	13.25
1934	16.9	1934	23.49	1934	10.82	1934	13.25
1932	16.89	1932	23.5	1932	10.82	1932	13.25
1930	16.89	1930	23.51	1930	10.83	1930	13.26
1928	16.89	1928	23.51	1928	10.83	1928	13.26
1926	16.89	1926	23.51	1926	10.83	1926	13.26
1924	16.88	1924	23.51	1924	10.82	1924	13.26
1922	16.88	1922	23.51	1922	10.82	1922	13.26
1920	16.88	1920	23.51	1920	10.82	1920	13.26
1918	16.88	1918	23.51	1918	10.82	1918	13.27
1916	16.88	1916	23.52	1916	10.82	1916	13.27
1914	16.89	1914	23.54	1914	10.83	1914	13.27
1912	16.88	1912	23.56	1912	10.84	1912	13.28
1910	16.88	1910	23.58	1910	10.84	1910	13.27
1908	16.87	1908	23.6	1908	10.85	1908	13.27
1906	16.87	1906	23.61	1906	10.86	1906	13.27
1904	16.86	1904	23.63	1904	10.86	1904	13.26
1902	16.86	1902	23.63	1902	10.86	1902	13.26
1900	16.85	1900	23.64	1900	10.86	1900	13.26
1898	16.85	1898	23.64	1898	10.86	1898	13.26
1896	16.85	1896	23.65	1896	10.86	1896	13.27
1894	16.85	1894	23.65	1894	10.86	1894	13.27
1892	16.85	1892	23.65	1892	10.86	1892	13.27
1890	16.84	1890	23.66	1890	10.86	1890	13.27
1888	16.84	1888	23.66	1888	10.86	1888	13.27
1886	16.84	1886	23.67	1886	10.86	1886	13.27
1884	16.84	1884	23.68	1884	10.86	1884	13.27
1882	16.84	1882	23.69	1882	10.87	1882	13.27
1880	16.83	1880	23.7	1880	10.87	1880	13.27
1878	16.83	1878	23.71	1878	10.87	1878	13.27
1876	16.82	1876	23.71	1876	10.87	1876	13.26
1874	16.81	1874	23.71	1874	10.86	1874	13.26
1872	16.81	1872	23.71	1872	10.86	1872	13.25
1870	16.81	1870	23.7	1870	10.86	1870	13.25
1868	16.81	1868	23.7	1868	10.85	1868	13.25
1866	16.8	1866	23.71	1866	10.85	1866	13.25
1864	16.8	1864	23.71	1864	10.85	1864	13.24
1862	16.79	1862	23.71	1862	10.85	1862	13.23
1860	16.77	1860	23.72	1860	10.84	1860	13.22
1858	16.76	1858	23.71	1858	10.84	1858	13.2
1856	16.74	1856	23.7	1856	10.83	1856	13.18
1854	16.72	1854	23.69	1854	10.82	1854	13.16
1852	16.71	1852	23.67	1852	10.81	1852	13.15
1850	16.7	1850	23.65	1850	10.8	1850	13.14
1848	16.69	1848	23.62	1848	10.79	1848	13.13
1846	16.68	1846	23.6	1846	10.78	1846	13.12
1844	16.67	1844	23.58	1844	10.77	1844	13.11
1842	16.67	1842	23.56	1842	10.75	1842	13.09
1840	16.66	1840	23.55	1840	10.74	1840	13.08
1838	16.65	1838	23.54	1838	10.73	1838	13.06
1836	16.63	1836	23.52	1836	10.72	1836	13.05
1834	16.62	1834	23.51	1834	10.71	1834	13.03
1832	16.61	1832	23.48	1832	10.69	1832	13.02
1830	16.6	1830	23.45	1830	10.68	1830	13
1828	16.59	1828	23.41	1828	10.66	1828	12.98
1826	16.58	1826	23.38	1826	10.65	1826	12.95
1824	16.56	1824	23.35	1824	10.63	1824	12.93
1822	16.55	1822	23.32	1822	10.62	1822	12.91
1820	16.54	1820	23.31	1820	10.6	1820	12.89
1818	16.52	1818	23.3	1818	10.6	1818	12.87
1816	16.5	1816	23.3	1816	10.59	1816	12.84
1814	16.48	1814	23.3	1814	10.58	1814	12.81
1812	16.46	1812	23.3	1812	10.58	1812	12.77
1810	16.44	1810	23.29	1810	10.56	1810	12.74
1808	16.42	1808	23.27	1808	10.55	1808	12.71
1806	16.4	1806	23.26	1806	10.53	1806	12.68
1804	16.38	1804	23.24	1804	10.51	1804	12.65
1802	16.36	1802	23.23	1802	10.49	1802	12.62
1800	16.35	1800	23.22	1800	10.47	1800	12.58
1798	16.33	1798	23.2	1798	10.46	1798	12.55
1796	16.31	1796	23.19	1796	10.44	1796	12.51
1794	16.3	1794	23.17	1794	10.42	1794	12.47
1792	16.28	1792	23.14	1792	10.4	1792	12.43
1790	16.26	1790	23.11	1790	10.37	1790	12.39
1788	16.24	1788	23.09	1788	10.35	1788	12.35
1786	16.22	1786	23.06	1786	10.33	1786	12.31
1784	16.19	1784	23.05	1784	10.3	1784	12.26
1782	16.16	1782	23.03	1782	10.28	1782	12.21
1780	16.12	1780	23.01	1780	10.26	1780	12.15
1778	16.09	1778	22.98	1778	10.24	1778	12.09
1776	16.05	1776	22.95	1776	10.21	1776	12.03
1774	16.02	1774	22.9	1774	10.18	1774	11.97
1772	16	1772	22.83	1772	10.13	1772	11.92
1770	15.97	1770	22.74	1770	10.07	1770	11.85
1768	15.94	1768	22.63	1768	9.99	1768	11.78
1766	15.9	1766	22.52	1766	9.91	1766	11.71
1764	15.86	1764	22.4	1764	9.82	1764	11.61
1762	15.81	1762	22.29	1762	9.74	1762	11.51
1760	15.76	1760	22.18	1760	9.65	1760	11.4
1758	15.71	1758	22.08	1758	9.58	1758	11.3
1756	15.64	1756	22	1756	9.51	1756	11.2
1754	15.59	1754	21.93	1754	9.44	1754	11.08
1752	15.56	1752	21.87	1752	9.38	1752	10.95
1750	15.51	1750	21.83	1750	9.33	1750	10.82
1748	15.39	1748	21.8	1748	9.28	1748	10.73
1746	15.29	1746	21.78	1746	9.23	1746	10.62
1744	15.38	1744	21.76	1744	9.2	1744	10.4
1742	15.69	1742	21.75	1742	9.18	1742	10.21
1740	15.92	1740	21.74	1740	9.17	1740	10.36
1738	15.87	1738	21.73	1738	9.16	1738	10.81
1736	15.66	1736	21.72	1736	9.15	1736	11.12
1734	15.51	1734	21.71	1734	9.14	1734	10.98
1732	15.46	1732	21.7	1732	9.13	1732	10.62
1730	15.39	1730	21.68	1730	9.11	1730	10.41
1728	15.27	1728	21.67	1728	9.09	1728	10.36
1726	15.18	1726	21.66	1726	9.07	1726	10.23
1724	15.1	1724	21.65	1724	9.06	1724	9.96
1722	14.98	1722	21.64	1722	9.04	1722	9.69
1720	14.81	1720	21.64	1720	9.04	1720	9.46
1718	14.65	1718	21.64	1718	9.03	1718	9.2
1716	14.51	1716	21.65	1716	9.02	1716	8.94
1714	14.41	1714	21.65	1714	9.02	1714	8.76
1712	14.34	1712	21.64	1712	9.01	1712	8.64
1710	14.3	1710	21.64	1710	8.99	1710	8.54
1708	14.25	1708	21.62	1708	8.98	1708	8.41
1706	14.17	1706	21.61	1706	8.97	1706	8.23
1704	14.03	1704	21.62	1704	8.96	1704	7.98
1702	13.84	1702	21.63	1702	8.95	1702	7.69
1700	13.6	1700	21.66	1700	8.93	1700	7.36
1698	13.35	1698	21.7	1698	8.9	1698	7.05
1696	13.1	1696	21.75	1696	8.86	1696	6.76
1694	12.87	1694	21.81	1694	8.81	1694	6.51
1692	12.66	1692	21.87	1692	8.75	1692	6.27
1690	12.47	1690	21.91	1690	8.68	1690	6.06
1688	12.3	1688	21.95	1688	8.6	1688	5.87
1686	12.15	1686	21.98	1686	8.51	1686	5.72
1684	12.05	1684	21.99	1684	8.41	1684	5.6
1682	11.97	1682	21.99	1682	8.3	1682	5.52
1680	11.94	1680	21.99	1680	8.19	1680	5.47
1678	11.92	1678	21.98	1678	8.07	1678	5.45
1676	11.91	1676	21.97	1676	7.95	1676	5.43
1674	11.89	1674	21.95	1674	7.84	1674	5.4
1672	11.84	1672	21.94	1672	7.73	1672	5.35
1670	11.78	1670	21.93	1670	7.62	1670	5.29
1668	11.73	1668	21.92	1668	7.52	1668	5.24
1666	11.69	1666	21.91	1666	7.43	1666	5.21
1664	11.67	1664	21.9	1664	7.34	1664	5.19
1662	11.66	1662	21.89	1662	7.26	1662	5.18
1660	11.65	1660	21.88	1660	7.19	1660	5.18
1658	11.66	1658	21.87	1658	7.13	1658	5.19
1656	11.66	1656	21.86	1656	7.07	1656	5.19
1654	11.64	1654	21.85	1654	7	1654	5.18
1652	11.62	1652	21.82	1652	6.94	1652	5.17
1650	11.61	1650	21.77	1650	6.87	1650	5.17
1648	11.61	1648	21.69	1648	6.8	1648	5.18
1646	11.62	1646	21.59	1646	6.73	1646	5.19
1644	11.64	1644	21.47	1644	6.66	1644	5.2
1642	11.64	1642	21.34	1642	6.6	1642	5.18
1640	11.63	1640	21.21	1640	6.55	1640	5.15
1638	11.62	1638	21.09	1638	6.52	1638	5.11
1636	11.61	1636	20.99	1636	6.5	1636	5.07
1634	11.62	1634	20.9	1634	6.5	1634	5.06
1632	11.64	1632	20.83	1632	6.52	1632	5.06
1630	11.67	1630	20.77	1630	6.55	1630	5.08
1628	11.72	1628	20.74	1628	6.59	1628	5.11
1626	11.76	1626	20.73	1626	6.65	1626	5.14
1624	11.79	1624	20.74	1624	6.73	1624	5.16
1622	11.81	1622	20.77	1622	6.83	1622	5.17
1620	11.83	1620	20.81	1620	6.95	1620	5.18
1618	11.85	1618	20.86	1618	7.08	1618	5.2
1616	11.87	1616	20.9	1616	7.21	1616	5.22
1614	11.91	1614	20.94	1614	7.35	1614	5.25
1612	11.96	1612	20.97	1612	7.47	1612	5.29
1610	12.01	1610	20.99	1610	7.6	1610	5.34
1608	12.06	1608	21	1608	7.72	1608	5.38
1606	12.11	1606	21.01	1606	7.84	1606	5.41
1604	12.15	1604	21.03	1604	7.97	1604	5.43
1602	12.17	1602	21.06	1602	8.1	1602	5.44
1600	12.19	1600	21.09	1600	8.22	1600	5.45
1598	12.2	1598	21.12	1598	8.35	1598	5.46
1596	12.21	1596	21.16	1596	8.47	1596	5.46
1594	12.22	1594	21.21	1594	8.59	1594	5.47
1592	12.23	1592	21.25	1592	8.7	1592	5.48
1590	12.25	1590	21.31	1590	8.81	1590	5.5
1588	12.26	1588	21.37	1588	8.92	1588	5.52
1586	12.28	1586	21.46	1586	9.03	1586	5.54
1584	12.28	1584	21.56	1584	9.15	1584	5.55
1582	12.27	1582	21.67	1582	9.26	1582	5.55
1580	12.26	1580	21.8	1580	9.38	1580	5.55
1578	12.26	1578	21.93	1578	9.5	1578	5.57
1576	12.27	1576	22.05	1576	9.61	1576	5.61
1574	12.31	1574	22.17	1574	9.7	1574	5.68
1572	12.39	1572	22.27	1572	9.78	1572	5.78
1570	12.5	1570	22.35	1570	9.85	1570	5.91
1568	12.61	1568	22.41	1568	9.91	1568	6.04
1566	12.72	1566	22.46	1566	9.96	1566	6.16
1564	12.8	1564	22.5	1564	10.01	1564	6.24
1562	12.84	1562	22.54	1562	10.06	1562	6.28
1560	12.85	1560	22.58	1560	10.11	1560	6.29
1558	12.82	1558	22.62	1558	10.14	1558	6.28
1556	12.79	1556	22.64	1556	10.17	1556	6.27
1554	12.77	1554	22.66	1554	10.19	1554	6.26
1552	12.76	1552	22.68	1552	10.19	1552	6.27
1550	12.77	1550	22.7	1550	10.2	1550	6.27
1548	12.77	1548	22.74	1548	10.22	1548	6.28
1546	12.77	1546	22.81	1546	10.26	1546	6.26
1544	12.75	1544	22.91	1544	10.32	1544	6.25
1542	12.73	1542	23.03	1542	10.39	1542	6.23
1540	12.73	1540	23.14	1540	10.47	1540	6.25
1538	12.75	1538	23.24	1538	10.54	1538	6.29
1536	12.8	1536	23.31	1536	10.58	1536	6.35
1534	12.86	1534	23.33	1534	10.59	1534	6.42
1532	12.93	1532	23.32	1532	10.58	1532	6.48
1530	12.99	1530	23.3	1530	10.56	1530	6.52
1528	13.04	1528	23.27	1528	10.55	1528	6.55
1526	13.1	1526	23.25	1526	10.55	1526	6.59
1524	13.16	1524	23.24	1524	10.55	1524	6.63
1522	13.24	1522	23.24	1522	10.55	1522	6.71
1520	13.34	1520	23.24	1520	10.56	1520	6.82
1518	13.46	1518	23.23	1518	10.56	1518	6.95
1516	13.58	1516	23.21	1516	10.55	1516	7.09
1514	13.7	1514	23.2	1514	10.54	1514	7.21
1512	13.8	1512	23.2	1512	10.54	1512	7.33
1510	13.88	1510	23.22	1510	10.56	1510	7.44
1508	13.96	1508	23.26	1508	10.59	1508	7.54
1506	14.04	1506	23.32	1506	10.64	1506	7.66
1504	14.12	1504	23.38	1504	10.68	1504	7.79
1502	14.2	1502	23.45	1502	10.72	1502	7.91
1500	14.27	1500	23.49	1500	10.76	1500	8.01
1498	14.33	1498	23.51	1498	10.78	1498	8.09
1496	14.36	1496	23.51	1496	10.79	1496	8.14
1494	14.38	1494	23.5	1494	10.79	1494	8.15
1492	14.39	1492	23.47	1492	10.78	1492	8.16
1490	14.39	1490	23.44	1490	10.77	1490	8.15
1488	14.38	1488	23.41	1488	10.76	1488	8.14
1486	14.37	1486	23.37	1486	10.75	1486	8.12
1484	14.35	1484	23.34	1484	10.74	1484	8.09
1482	14.32	1482	23.3	1482	10.73	1482	8.04
1480	14.27	1480	23.26	1480	10.72	1480	7.97
1478	14.23	1478	23.22	1478	10.71	1478	7.89
1476	14.17	1476	23.18	1476	10.7	1476	7.8
1474	14.11	1474	23.15	1474	10.7	1474	7.71
1472	14.06	1472	23.12	1472	10.69	1472	7.63
1470	14.01	1470	23.09	1470	10.69	1470	7.57
1468	13.97	1468	23.07	1468	10.68	1468	7.51
1466	13.93	1466	23.04	1466	10.68	1466	7.44
1464	13.86	1464	23	1464	10.66	1464	7.35
1462	13.78	1462	22.96	1462	10.65	1462	7.24
1460	13.68	1460	22.91	1460	10.64	1460	7.12
1458	13.57	1458	22.86	1458	10.62	1458	6.99
1456	13.47	1456	22.81	1456	10.6	1456	6.88
1454	13.38	1454	22.76	1454	10.59	1454	6.79
1452	13.32	1452	22.73	1452	10.57	1452	6.73
1450	13.3	1450	22.69	1450	10.56	1450	6.71
1448	13.3	1448	22.66	1448	10.55	1448	6.72
1446	13.33	1446	22.63	1446	10.54	1446	6.74
1444	13.37	1444	22.58	1444	10.53	1444	6.78
1442	13.43	1442	22.53	1442	10.51	1442	6.83
1440	13.5	1440	22.47	1440	10.5	1440	6.9
1438	13.57	1438	22.42	1438	10.49	1438	6.98
1436	13.64	1436	22.37	1436	10.47	1436	7.06
1434	13.7	1434	22.33	1434	10.46	1434	7.14
1432	13.75	1432	22.3	1432	10.45	1432	7.21
1430	13.79	1430	22.28	1430	10.44	1430	7.27
1428	13.81	1428	22.25	1428	10.43	1428	7.3
1426	13.81	1426	22.22	1426	10.43	1426	7.3
1424	13.79	1424	22.18	1424	10.42	1424	7.28
1422	13.75	1422	22.14	1422	10.4	1422	7.24
1420	13.69	1420	22.09	1420	10.39	1420	7.18
1418	13.62	1418	22.05	1418	10.38	1418	7.11
1416	13.55	1416	22.02	1416	10.36	1416	7.04
1414	13.48	1414	22	1414	10.35	1414	6.96
1412	13.41	1412	21.99	1412	10.34	1412	6.89
1410	13.35	1410	21.99	1410	10.34	1410	6.83
1408	13.31	1408	21.98	1408	10.33	1408	6.79
1406	13.29	1406	21.97	1406	10.31	1406	6.76
1404	13.29	1404	21.94	1404	10.3	1404	6.75
1402	13.3	1402	21.92	1402	10.27	1402	6.76
1400	13.32	1400	21.88	1400	10.25	1400	6.78
1398	13.35	1398	21.86	1398	10.22	1398	6.82
1396	13.39	1396	21.83	1396	10.2	1396	6.87
1394	13.43	1394	21.82	1394	10.18	1394	6.92
1392	13.46	1392	21.81	1392	10.15	1392	6.97
1390	13.49	1390	21.8	1390	10.14	1390	7.01
1388	13.52	1388	21.8	1388	10.12	1388	7.05
1386	13.54	1386	21.79	1386	10.1	1386	7.08
1384	13.57	1384	21.78	1384	10.08	1384	7.13
1382	13.61	1382	21.75	1382	10.05	1382	7.18
1380	13.66	1380	21.73	1380	10.03	1380	7.24
1378	13.72	1378	21.69	1378	10.01	1378	7.32
1376	13.78	1376	21.65	1376	9.98	1376	7.4
1374	13.86	1374	21.6	1374	9.96	1374	7.5
1372	13.93	1372	21.55	1372	9.94	1372	7.59
1370	14	1370	21.51	1370	9.92	1370	7.69
1368	14.07	1368	21.47	1368	9.9	1368	7.78
1366	14.12	1366	21.44	1366	9.9	1366	7.84
1364	14.16	1364	21.43	1364	9.9	1364	7.89
1362	14.17	1362	21.43	1362	9.9	1362	7.92
1360	14.18	1360	21.45	1360	9.92	1360	7.92
1358	14.16	1358	21.48	1358	9.94	1358	7.9
1356	14.13	1356	21.53	1356	9.97	1356	7.86
1354	14.09	1354	21.57	1354	10	1354	7.8
1352	14.04	1352	21.62	1352	10.03	1352	7.72
1350	13.98	1350	21.65	1350	10.06	1350	7.64
1348	13.92	1348	21.67	1348	10.08	1348	7.55
1346	13.86	1346	21.68	1346	10.1	1346	7.46
1344	13.8	1344	21.67	1344	10.11	1344	7.37
1342	13.74	1342	21.66	1342	10.12	1342	7.3
1340	13.7	1340	21.65	1340	10.13	1340	7.26
1338	13.68	1338	21.64	1338	10.14	1338	7.25
1336	13.69	1336	21.64	1336	10.16	1336	7.27
1334	13.72	1334	21.64	1334	10.18	1334	7.32
1332	13.76	1332	21.65	1332	10.2	1332	7.38
1330	13.81	1330	21.66	1330	10.22	1330	7.45
1328	13.86	1328	21.67	1328	10.23	1328	7.51
1326	13.9	1326	21.67	1326	10.24	1326	7.57
1324	13.93	1324	21.66	1324	10.25	1324	7.61
1322	13.95	1322	21.65	1322	10.25	1322	7.63
1320	13.96	1320	21.63	1320	10.24	1320	7.65
1318	13.98	1318	21.61	1318	10.24	1318	7.68
1316	14	1316	21.59	1316	10.23	1316	7.71
1314	14.02	1314	21.58	1314	10.23	1314	7.75
1312	14.06	1312	21.56	1312	10.22	1312	7.79
1310	14.1	1310	21.55	1310	10.22	1310	7.84
1308	14.13	1308	21.54	1308	10.21	1308	7.89
1306	14.17	1306	21.52	1306	10.21	1306	7.93
1304	14.2	1304	21.5	1304	10.21	1304	7.96
1302	14.22	1302	21.48	1302	10.2	1302	7.98
1300	14.23	1300	21.45	1300	10.19	1300	7.98
1298	14.23	1298	21.42	1298	10.18	1298	7.97
1296	14.22	1296	21.38	1296	10.17	1296	7.94
1294	14.2	1294	21.34	1294	10.16	1294	7.9
1292	14.17	1292	21.29	1292	10.15	1292	7.84
1290	14.14	1290	21.25	1290	10.13	1290	7.79
1288	14.11	1288	21.21	1288	10.12	1288	7.74
1286	14.09	1286	21.17	1286	10.1	1286	7.69
1284	14.07	1284	21.14	1284	10.09	1284	7.66
1282	14.06	1282	21.11	1282	10.08	1282	7.64
1280	14.05	1280	21.09	1280	10.06	1280	7.62
1278	14.05	1278	21.06	1278	10.05	1278	7.61
1276	14.04	1276	21.04	1276	10.03	1276	7.61
1274	14.04	1274	21.01	1274	10.01	1274	7.6
1272	14.04	1272	20.98	1272	9.99	1272	7.59
1270	14.03	1270	20.95	1270	9.97	1270	7.57
1268	14.02	1268	20.92	1268	9.95	1268	7.55
1266	14.01	1266	20.89	1266	9.92	1266	7.52
1264	14	1264	20.85	1264	9.89	1264	7.49
1262	13.98	1262	20.81	1262	9.86	1262	7.44
1260	13.95	1260	20.76	1260	9.82	1260	7.39
1258	13.92	1258	20.71	1258	9.78	1258	7.34
1256	13.88	1256	20.64	1256	9.73	1256	7.28
1254	13.85	1254	20.57	1254	9.67	1254	7.22
1252	13.82	1252	20.49	1252	9.6	1252	7.16
1250	13.78	1250	20.4	1250	9.53	1250	7.11
1248	13.76	1248	20.3	1248	9.44	1248	7.06
1246	13.74	1246	20.21	1246	9.35	1246	7.03
1244	13.73	1244	20.11	1244	9.24	1244	7.01
1242	13.74	1242	20.01	1242	9.13	1242	7
1240	13.76	1240	19.92	1240	9.01	1240	7.02
1238	13.8	1238	19.84	1238	8.89	1238	7.07
1236	13.86	1236	19.77	1236	8.77	1236	7.14
1234	13.94	1234	19.72	1234	8.65	1234	7.23
1232	14.04	1232	19.68	1232	8.55	1232	7.36
1230	14.14	1230	19.66	1230	8.46	1230	7.5
1228	14.26	1228	19.65	1228	8.38	1228	7.66
1226	14.38	1226	19.67	1226	8.31	1226	7.83
1224	14.5	1224	19.69	1224	8.26	1224	8
1222	14.6	1222	19.72	1222	8.21	1222	8.16
1220	14.7	1220	19.76	1220	8.18	1220	8.3
1218	14.77	1218	19.81	1218	8.15	1218	8.41
1216	14.83	1216	19.86	1216	8.14	1216	8.49
1214	14.86	1214	19.91	1214	8.13	1214	8.54
1212	14.88	1212	19.95	1212	8.13	1212	8.57
1210	14.89	1210	20	1210	8.14	1210	8.58
1208	14.89	1208	20.04	1208	8.15	1208	8.58
1206	14.9	1206	20.09	1206	8.18	1206	8.59
1204	14.92	1204	20.13	1204	8.21	1204	8.62
1202	14.96	1202	20.17	1202	8.26	1202	8.68
1200	15.01	1200	20.21	1200	8.31	1200	8.76
1198	15.07	1198	20.25	1198	8.37	1198	8.87
1196	15.15	1196	20.29	1196	8.44	1196	9.01
1194	15.23	1194	20.33	1194	8.51	1194	9.16
1192	15.32	1192	20.36	1192	8.59	1192	9.31
1190	15.4	1190	20.4	1190	8.67	1190	9.47
1188	15.48	1188	20.43	1188	8.76	1188	9.62
1186	15.56	1186	20.46	1186	8.84	1186	9.75
1184	15.62	1184	20.5	1184	8.93	1184	9.86
1182	15.66	1182	20.53	1182	9.02	1182	9.95
1180	15.7	1180	20.56	1180	9.11	1180	10.02
1178	15.72	1178	20.6	1178	9.19	1178	10.06
1176	15.73	1176	20.64	1176	9.27	1176	10.09
1174	15.74	1174	20.69	1174	9.35	1174	10.1
1172	15.74	1172	20.75	1172	9.43	1172	10.1
1170	15.73	1170	20.81	1170	9.5	1170	10.09
1168	15.73	1168	20.87	1168	9.57	1168	10.09
1166	15.72	1166	20.94	1166	9.64	1166	10.08
1164	15.72	1164	21.02	1164	9.7	1164	10.09
1162	15.73	1162	21.09	1162	9.76	1162	10.12
1160	15.75	1160	21.17	1160	9.81	1160	10.16
1158	15.77	1158	21.24	1158	9.86	1158	10.21
1156	15.8	1156	21.31	1156	9.9	1156	10.29
1154	15.84	1154	21.38	1154	9.94	1154	10.37
1152	15.88	1152	21.44	1152	9.98	1152	10.45
1150	15.92	1150	21.5	1150	10.01	1150	10.53
1148	15.95	1148	21.55	1148	10.04	1148	10.61
1146	15.97	1146	21.6	1146	10.07	1146	10.66
1144	15.99	1144	21.64	1144	10.09	1144	10.71
1142	16.01	1142	21.67	1142	10.11	1142	10.74
1140	16.01	1140	21.7	1140	10.13	1140	10.75
1138	16.01	1138	21.73	1138	10.15	1138	10.75
1136	16.01	1136	21.75	1136	10.17	1136	10.74
1134	16	1134	21.77	1134	10.18	1134	10.71
1132	15.98	1132	21.79	1132	10.2	1132	10.67
1130	15.96	1130	21.8	1130	10.21	1130	10.63
1128	15.94	1128	21.82	1128	10.23	1128	10.59
1126	15.93	1126	21.84	1126	10.24	1126	10.55
1124	15.91	1124	21.85	1124	10.26	1124	10.51
1122	15.9	1122	21.87	1122	10.27	1122	10.47
1120	15.88	1120	21.89	1120	10.28	1120	10.43
1118	15.87	1118	21.91	1118	10.3	1118	10.39
1116	15.85	1116	21.93	1116	10.31	1116	10.35
1114	15.84	1114	21.95	1114	10.33	1114	10.32
1112	15.83	1112	21.97	1112	10.34	1112	10.28
1110	15.81	1110	21.99	1110	10.36	1110	10.24
1108	15.8	1108	22	1108	10.37	1108	10.2
1106	15.79	1106	22.02	1106	10.39	1106	10.16
1104	15.77	1104	22.03	1104	10.4	1104	10.12
1102	15.75	1102	22.04	1102	10.42	1102	10.07
1100	15.73	1100	22.04	1100	10.43	1100	10.02
1098	15.7	1098	22.04	1098	10.44	1098	9.95
1096	15.67	1096	22.03	1096	10.45	1096	9.89
1094	15.63	1094	22.03	1094	10.46	1094	9.82
1092	15.6	1092	22.03	1092	10.48	1092	9.75
1090	15.56	1090	22.03	1090	10.49	1090	9.68
1088	15.53	1088	22.02	1088	10.49	1088	9.61
1086	15.51	1086	22.02	1086	10.5	1086	9.57
1084	15.5	1084	22.01	1084	10.5	1084	9.55
1082	15.5	1082	21.99	1082	10.5	1082	9.55
1080	15.52	1080	21.96	1080	10.49	1080	9.59
1078	15.55	1078	21.92	1078	10.47	1078	9.65
1076	15.59	1076	21.86	1076	10.44	1076	9.74
1074	15.64	1074	21.79	1074	10.4	1074	9.84
1072	15.69	1072	21.7	1072	10.33	1072	9.94
1070	15.74	1070	21.59	1070	10.24	1070	10.03
1068	15.78	1068	21.48	1068	10.13	1068	10.12
1066	15.82	1066	21.37	1066	9.99	1066	10.2
1064	15.85	1064	21.25	1064	9.84	1064	10.28
1062	15.88	1062	21.15	1062	9.69	1062	10.36
1060	15.91	1060	21.07	1060	9.55	1060	10.43
1058	15.94	1058	21.01	1058	9.42	1058	10.51
1056	15.97	1056	20.98	1056	9.33	1056	10.59
1054	16	1054	20.97	1054	9.28	1054	10.67
1052	16.03	1052	20.99	1052	9.28	1052	10.74
1050	16.05	1050	21.03	1050	9.32	1050	10.79
1048	16.06	1048	21.09	1048	9.39	1048	10.83
1046	16.07	1046	21.17	1046	9.49	1046	10.86
1044	16.07	1044	21.25	1044	9.6	1044	10.87
1042	16.06	1042	21.33	1042	9.72	1042	10.86
1040	16.05	1040	21.42	1040	9.83	1040	10.84
1038	16.03	1038	21.5	1038	9.93	1038	10.81
1036	16.02	1036	21.58	1036	10.03	1036	10.8
1034	16.01	1034	21.66	1034	10.11	1034	10.8
1032	16.03	1032	21.74	1032	10.19	1032	10.84
1030	16.05	1030	21.81	1030	10.27	1030	10.91
1028	16.1	1028	21.89	1028	10.33	1028	11
1026	16.15	1026	21.96	1026	10.4	1026	11.13
1024	16.21	1024	22.03	1024	10.45	1024	11.27
1022	16.28	1022	22.09	1022	10.5	1022	11.41
1020	16.34	1020	22.15	1020	10.55	1020	11.56
1018	16.4	1018	22.21	1018	10.59	1018	11.71
1016	16.46	1016	22.26	1016	10.63	1016	11.85
1014	16.52	1014	22.31	1014	10.67	1014	11.99
1012	16.57	1012	22.36	1012	10.7	1012	12.13
1010	16.63	1010	22.41	1010	10.72	1010	12.26
1008	16.68	1008	22.45	1008	10.75	1008	12.4
1006	16.73	1006	22.5	1006	10.77	1006	12.53
1004	16.77	1004	22.55	1004	10.79	1004	12.65
1002	16.81	1002	22.59	1002	10.8	1002	12.77
1000	16.85	1000	22.64	1000	10.82	1000	12.88
998	16.89	998	22.69	998	10.83	998	12.98
996	16.92	996	22.74	996	10.84	996	13.06
994	16.95	994	22.78	994	10.84	994	13.13
992	16.97	992	22.83	992	10.85	992	13.18
990	16.98	990	22.87	990	10.86	990	13.21
988	16.98	988	22.9	988	10.86	988	13.21
986	16.97	986	22.94	986	10.86	986	13.2
984	16.96	984	22.97	984	10.86	984	13.16
982	16.94	982	23	982	10.86	982	13.12
980	16.92	980	23.04	980	10.86	980	13.07
978	16.91	978	23.07	978	10.86	978	13.03
976	16.9	976	23.1	976	10.86	976	12.99
974	16.89	974	23.13	974	10.86	974	12.97
972	16.89	972	23.17	972	10.86	972	12.97
970	16.9	970	23.2	970	10.86	970	12.98
968	16.91	968	23.23	968	10.86	968	13.02
966	16.92	966	23.26	966	10.86	966	13.06
964	16.94	964	23.3	964	10.86	964	13.11
962	16.96	962	23.33	962	10.86	962	13.17
960	16.98	960	23.37	960	10.86	960	13.21
958	16.99	958	23.4	958	10.86	958	13.25
956	17	956	23.43	956	10.86	956	13.28
954	17	954	23.46	954	10.86	954	13.3
952	17	952	23.5	952	10.87	952	13.3
950	16.99	950	23.53	950	10.87	950	13.3
948	16.99	948	23.57	948	10.87	948	13.29
946	16.97	946	23.6	946	10.87	946	13.27
944	16.96	944	23.63	944	10.87	944	13.24
942	16.94	942	23.66	942	10.87	942	13.22
940	16.93	940	23.69	940	10.87	940	13.19
938	16.91	938	23.72	938	10.87	938	13.16
936	16.89	936	23.75	936	10.88	936	13.14
934	16.88	934	23.77	934	10.88	934	13.12
932	16.87	932	23.8	932	10.88	932	13.11
930	16.87	930	23.82	930	10.87	930	13.1
928	16.86	928	23.84	928	10.87	928	13.1
926	16.85	926	23.86	926	10.86	926	13.09
924	16.85	924	23.87	924	10.85	924	13.09
922	16.84	922	23.88	922	10.84	922	13.1
920	16.84	920	23.89	920	10.83	920	13.12
918	16.85	918	23.89	918	10.81	918	13.14
916	16.85	916	23.89	916	10.79	916	13.17
914	16.86	914	23.89	914	10.76	914	13.2
912	16.87	912	23.88	912	10.73	912	13.23
910	16.88	910	23.86	910	10.69	910	13.26
908	16.88	908	23.84	908	10.65	908	13.28
906	16.88	906	23.81	906	10.61	906	13.29
904	16.88	904	23.77	904	10.57	904	13.29
902	16.88	902	23.72	902	10.52	902	13.29
900	16.87	900	23.67	900	10.47	900	13.29
898	16.87	898	23.61	898	10.43	898	13.28
896	16.86	896	23.54	896	10.38	896	13.26
894	16.84	894	23.46	894	10.33	894	13.22
892	16.82	892	23.39	892	10.28	892	13.17
890	16.79	890	23.31	890	10.24	890	13.11
888	16.76	888	23.24	888	10.2	888	13.04
886	16.73	886	23.19	886	10.16	886	12.96
884	16.7	884	23.14	884	10.13	884	12.88
882	16.67	882	23.1	882	10.11	882	12.8
880	16.64	880	23.07	880	10.09	880	12.72
878	16.61	878	23.04	878	10.07	878	12.66
876	16.59	876	23.02	876	10.06	876	12.6
874	16.58	874	23.01	874	10.05	874	12.56
872	16.57	872	23	872	10.05	872	12.53
870	16.56	870	22.99	870	10.05	870	12.51
868	16.56	868	22.98	868	10.05	868	12.49
866	16.56	866	22.97	866	10.05	866	12.48
864	16.55	864	22.96	864	10.05	864	12.46
862	16.55	862	22.94	862	10.06	862	12.44
860	16.53	860	22.92	860	10.06	860	12.41
858	16.52	858	22.89	858	10.06	858	12.37
856	16.51	856	22.88	856	10.07	856	12.34
854	16.49	854	22.87	854	10.07	854	12.31
852	16.48	852	22.87	852	10.07	852	12.29
850	16.47	850	22.88	850	10.07	850	12.27
848	16.46	848	22.9	848	10.07	848	12.25
846	16.45	846	22.92	846	10.07	846	12.23
844	16.44	844	22.95	844	10.06	844	12.21
842	16.42	842	22.97	842	10.05	842	12.19
840	16.41	840	23	840	10.04	840	12.17
838	16.39	838	23.02	838	10.03	838	12.14
836	16.38	836	23.04	836	10.02	836	12.11
834	16.36	834	23.06	834	10.01	834	12.07
832	16.34	832	23.09	832	10	832	12.02
830	16.31	830	23.12	830	9.99	830	11.96
828	16.28	828	23.17	828	9.98	828	11.89
826	16.25	826	23.21	826	9.96	826	11.81
824	16.22	824	23.27	824	9.95	824	11.73
822	16.19	822	23.32	822	9.94	822	11.65
820	16.16	820	23.37	820	9.93	820	11.57
818	16.13	818	23.41	818	9.91	818	11.49
816	16.1	816	23.44	816	9.89	816	11.41
814	16.07	814	23.46	814	9.87	814	11.34
812	16.04	812	23.48	812	9.85	812	11.27
810	16.01	810	23.49	810	9.83	810	11.21
808	15.98	808	23.5	808	9.81	808	11.14
806	15.96	806	23.5	806	9.78	806	11.08
804	15.93	804	23.51	804	9.75	804	11.02
802	15.9	802	23.52	802	9.73	802	10.95
800	15.87	800	23.53	800	9.7	800	10.89
798	15.84	798	23.53	798	9.68	798	10.82
796	15.81	796	23.53	796	9.66	796	10.74
794	15.77	794	23.53	794	9.64	794	10.67
792	15.74	792	23.53	792	9.62	792	10.6
790	15.71	790	23.54	790	9.6	790	10.53
788	15.69	788	23.54	788	9.57	788	10.46
786	15.66	786	23.54	786	9.55	786	10.4
784	15.63	784	23.54	784	9.53	784	10.34
782	15.61	782	23.53	782	9.51	782	10.28
780	15.58	780	23.53	780	9.49	780	10.23
778	15.55	778	23.52	778	9.47	778	10.17
776	15.53	776	23.52	776	9.45	776	10.12
774	15.5	774	23.51	774	9.43	774	10.07
772	15.48	772	23.51	772	9.4	772	10.02
770	15.45	770	23.51	770	9.38	770	9.98
768	15.43	768	23.5	768	9.36	768	9.93
766	15.41	766	23.5	766	9.34	766	9.88
764	15.39	764	23.49	764	9.32	764	9.83
762	15.36	762	23.48	762	9.3	762	9.78
760	15.34	760	23.47	760	9.28	760	9.73
758	15.32	758	23.46	758	9.26	758	9.69
756	15.29	756	23.45	756	9.24	756	9.64
754	15.27	754	23.44	754	9.22	754	9.59
752	15.25	752	23.43	752	9.2	752	9.55
750	15.22	750	23.42	750	9.18	750	9.5
748	15.2	748	23.41	748	9.16	748	9.46
746	15.18	746	23.39	746	9.14	746	9.41
744	15.16	744	23.38	744	9.12	744	9.37
742	15.13	742	23.37	742	9.11	742	9.33
740	15.11	740	23.36	740	9.09	740	9.29
738	15.09	738	23.35	738	9.08	738	9.25
736	15.07	736	23.33	736	9.06	736	9.21
734	15.05	734	23.32	734	9.05	734	9.17
732	15.03	732	23.31	732	9.03	732	9.13
730	15	730	23.29	730	9.02	730	9.09
728	14.98	728	23.28	728	9	728	9.04
726	14.96	726	23.26	726	8.99	726	9
724	14.94	724	23.25	724	8.98	724	8.96
722	14.92	722	23.23	722	8.96	722	8.92
720	14.9	720	23.22	720	8.95	720	8.89
718	14.88	718	23.21	718	8.94	718	8.85
716	14.86	716	23.19	716	8.93	716	8.82
714	14.84	714	23.18	714	8.92	714	8.78
712	14.82	712	23.16	712	8.91	712	8.75
710	14.8	710	23.14	710	8.9	710	8.72
708	14.78	708	23.13	708	8.89	708	8.69
706	14.77	706	23.11	706	8.88	706	8.67
704	14.75	704	23.09	704	8.87	704	8.65
702	14.74	702	23.07	702	8.86	702	8.62
700	14.74	700	23.05	700	8.85	700	8.61
698	14.73	698	23.03	698	8.85	698	8.59
696	14.72	696	23	696	8.84	696	8.57
694	14.71	694	22.98	694	8.83	694	8.56
692	14.7	692	22.96	692	8.82	692	8.54
690	14.7	690	22.95	690	8.82	690	8.53
688	14.69	688	22.93	688	8.81	688	8.52
686	14.69	686	22.92	686	8.81	686	8.51
684	14.68	684	22.91	684	8.81	684	8.5
682	14.68	682	22.91	682	8.81	682	8.49
680	14.67	680	22.91	680	8.81	680	8.48
678	14.66	678	22.92	678	8.8	678	8.47
676	14.66	676	22.93	676	8.8	676	8.46
674	14.65	674	22.95	674	8.79	674	8.45
672	14.64	672	22.97	672	8.79	672	8.45
670	14.64	670	22.98	670	8.78	670	8.44
668	14.64	668	22.97	668	8.78	668	8.44
666	14.65	666	22.96	666	8.78	666	8.43
664	14.65	664	22.94	664	8.79	664	8.43
662	14.66	662	22.91	662	8.79	662	8.42
660	14.67	660	22.87	660	8.79	660	8.42
658	14.68	658	22.84	658	8.8	658	8.42
656	14.69	656	22.81	656	8.8	656	8.43
654	14.69	654	22.79	654	8.8	654	8.43
652	14.7	652	22.78	652	8.81	652	8.43
650	14.7	650	22.77	650	8.81	650	8.44
648	14.71	648	22.77	648	8.81	648	8.45
646	14.72	646	22.77	646	8.81	646	8.45
644	14.73	644	22.77	644	8.81	644	8.46
642	14.74	642	22.77	642	8.81	642	8.47
640	14.76	640	22.78	640	8.81	640	8.47
638	14.77	638	22.78	638	8.81	638	8.48
636	14.77	636	22.78	636	8.81	636	8.48
634	14.78	634	22.77	634	8.81	634	8.49
632	14.79	632	22.77	632	8.81	632	8.49
630	14.8	630	22.76	630	8.81	630	8.5
628	14.81	628	22.75	628	8.82	628	8.51
626	14.83	626	22.74	626	8.82	626	8.52
624	14.84	624	22.72	624	8.82	624	8.53
622	14.85	622	22.7	622	8.82	622	8.54
620	14.87	620	22.67	620	8.81	620	8.56
618	14.88	618	22.63	618	8.81	618	8.57
616	14.9	616	22.6	616	8.8	616	8.59
614	14.92	614	22.56	614	8.79	614	8.61
612	14.95	612	22.52	612	8.77	612	8.63
610	14.97	610	22.47	610	8.75	610	8.65
608	15	608	22.43	608	8.73	608	8.67
606	15.02	606	22.37	606	8.71	606	8.69
604	15.04	604	22.31	604	8.69	604	8.71
602	15.06	602	22.25	602	8.67	602	8.73
600	15.08	600	22.19	600	8.65	600	8.75
598	15.1	598	22.13	598	8.64	598	8.77
596	15.13	596	22.09	596	8.63	596	8.79
594	15.15	594	22.05	594	8.63	594	8.81
592	15.17	592	22.02	592	8.64	592	8.83
590	15.19	590	22	590	8.65	590	8.85
588	15.21	588	22	588	8.68	588	8.87
586	15.24	586	22.01	586	8.71	586	8.89
584	15.26	584	22.04	584	8.76	584	8.91
582	15.28	582	22.09	582	8.8	582	8.92
580	15.3	580	22.16	580	8.85	580	8.94
578	15.32	578	22.24	578	8.91	578	8.96
576	15.34	576	22.35	576	8.97	576	8.97
574	15.36	574	22.46	574	9.03	574	8.99
572	15.38	572	22.58	572	9.08	572	9
570	15.39	570	22.7	570	9.14	570	9.02
568	15.41	568	22.82	568	9.19	568	9.04
566	15.43	566	22.94	566	9.24	566	9.06
564	15.46	564	23.04	564	9.28	564	9.09
562	15.49	562	23.12	562	9.32	562	9.12
560	15.52	560	23.19	560	9.35	560	9.15
558	15.55	558	23.25	558	9.39	558	9.18
556	15.58	556	23.29	556	9.42	556	9.21
554	15.6	554	23.32	554	9.44	554	9.25
552	15.63	552	23.35	552	9.47	552	9.28
550	15.66	550	23.37	550	9.49	550	9.32
548	15.69	548	23.39	548	9.51	548	9.35
546	15.71	546	23.41	546	9.53	546	9.39
544	15.74	544	23.43	544	9.55	544	9.42
542	15.77	542	23.44	542	9.58	542	9.45
540	15.79	540	23.45	540	9.6	540	9.49
538	15.82	538	23.47	538	9.63	538	9.52
536	15.85	536	23.49	536	9.65	536	9.56
534	15.89	534	23.51	534	9.68	534	9.6
532	15.94	532	23.54	532	9.7	532	9.65
530	15.99	530	23.58	530	9.72	530	9.71
528	16.04	528	23.62	528	9.75	528	9.77
526	16.1	526	23.66	526	9.78	526	9.83
524	16.15	524	23.71	524	9.81	524	9.89
522	16.19	522	23.75	522	9.85	522	9.94
520	16.24	520	23.81	520	9.88	520	10
518	16.28	518	23.87	518	9.92	518	10.06
516	16.33	516	23.92	516	9.96	516	10.12
514	16.38	514	23.97	514	10	514	10.19
512	16.44	512	24.02	512	10.04	512	10.26
510	16.49	510	24.05	510	10.09	510	10.34
508	16.54	508	24.08	508	10.13	508	10.41
506	16.59	506	24.1	506	10.17	506	10.48
504	16.64	504	24.12	504	10.22	504	10.54
502	16.68	502	24.15	502	10.26	502	10.59
500	16.72	500	24.18	500	10.3	500	10.65
498	16.76	498	24.21	498	10.34	498	10.7
496	16.8	496	24.24	496	10.38	496	10.74
494	16.83	494	24.28	494	10.43	494	10.79
492	16.87	492	24.32	492	10.47	492	10.84
490	16.91	490	24.37	490	10.52	490	10.9
488	16.95	488	24.41	488	10.56	488	10.97
486	17.01	486	24.46	486	10.6	486	11.04
484	17.07	484	24.5	484	10.64	484	11.12
482	17.13	482	24.54	482	10.68	482	11.21
480	17.2	480	24.58	480	10.72	480	11.3
478	17.26	478	24.61	478	10.75	478	11.38
476	17.31	476	24.62	476	10.78	476	11.45
474	17.36	474	24.64	474	10.81	474	11.52
472	17.4	472	24.65	472	10.83	472	11.58
470	17.45	470	24.65	470	10.85	470	11.64
468	17.5	468	24.66	468	10.86	468	11.71
466	17.55	466	24.66	466	10.86	466	11.78
464	17.6	464	24.65	464	10.87	464	11.84
462	17.64	462	24.63	462	10.87	462	11.86
460	17.66	460	24.61	460	10.87	460	11.9
458	17.66	458	24.59	458	10.87	458	12.01
456	17.64	456	24.56	456	10.87	456	12.13
454	17.6	454	24.55	454	10.86	454	12.17
452	17.55	452	24.53	452	10.84	452	12.14
450	17.5	450	24.51	450	10.83	450	12.09
448	17.45					448	12.05
446	17.41					446	12.04
444	17.37					444	12.03
442	17.34					442	12.03
440	17.31					440	12.04
438	17.29					438	12.06
436	17.27					436	12.09
434	17.27					434	12.14
432	17.28					432	12.2
430	17.32					430	12.28
428	17.37					428	12.4
426	17.44					426	12.53
424	17.51					424	12.66
422	17.59					422	12.79
420	17.65					420	12.89
418	17.68					418	12.95
416	17.69					416	12.97
414	17.67					414	12.94
412	17.64					412	12.89
410	17.61					410	12.86
408	17.62					408	12.88
406	17.67					406	12.96
404	17.75					404	13.09
402	17.84					402	13.25
400	17.94					400	13.41
